# Supplementary material for: Identification of Upstream Transcriptional Regulators of Ischemic Cardiomyopathy Using Cardiac RNA-Seq Meta-Analysis
Source: PubMed Central journal article supplement (PMC7278960; doi:10.3390/ijms21103472), 2020-05-14
Supplement: ijms-21-03472-s001.pdf [file ijms-21-03472-s001.pdf]

Supplementary Tables

Supplementary Table S1. A complete list of differential expressed genes identified in meta-analysis.

| Ensembl_ID      | Gene_Symbol   | DE_1 <sup>1</sup> | DE_2 <sup>1</sup> | DE_3 <sup>1</sup> | DE_4 <sup>1</sup> | Adj_P <sup>2</sup> | Average_Log2FC <sup>3</sup> | Effect <sup>4</sup> |
|-----------------|---------------|-------------------|-------------------|-------------------|-------------------|--------------------|-----------------------------|---------------------|
| ENSG0000008311  | AASS          | 1                 | 1                 | 1                 | 0                 | 0.00E+00           | -1.03                       | Down                |
| ENSG00000075413 | MARK3         | 1                 | 1                 | 1                 | 0                 | 0.00E+00           | -0.88                       | Down                |
| ENSG00000076351 | SLC46A1       | 1                 | 0                 | 1                 | 0                 | 0.00E+00           | 0.48                        | Up                  |
| ENSG00000100196 | KDELR3        | 1                 | 0                 | 1                 | 0                 | 0.00E+00           | 0.72                        | Up                  |
| ENSG00000103415 | HMOX2         | 1                 | 1                 | 1                 | 0                 | 0.00E+00           | -0.81                       | Down                |
| ENSG00000105894 | PTN           | 0                 | 1                 | 1                 | 0                 | 0.00E+00           | 1.47                        | Up                  |
| ENSG00000106809 | OGN           | 1                 | 1                 | 1                 | 0                 | 0.00E+00           | 2.26                        | Up                  |
| ENSG00000106819 | ASPN          | 1                 | 1                 | 1                 | 0                 | 0.00E+00           | 1.99                        | Up                  |
| ENSG00000106823 | ECM2          | 0                 | 1                 | 1                 | 0                 | 0.00E+00           | 1.17                        | Up                  |
| ENSG00000118194 | TNNT2         | 1                 | 0                 | 1                 | 0                 | 0.00E+00           | -0.55                       | Down                |
| ENSG00000122034 | GTF3A         | 1                 | 0                 | 1                 | 0                 | 0.00E+00           | -0.54                       | Down                |
| ENSG00000123689 | GOS2          | 1                 | 0                 | 0                 | 0                 | 0.00E+00           | -1.57                       | Down                |
| ENSG00000126106 | TMEM53        | 1                 | 1                 | 0                 | 0                 | 0.00E+00           | -0.58                       | Down                |
| ENSG00000129250 | KIF1C         | 1                 | 0                 | 0                 | 0                 | 0.00E+00           | -0.56                       | Down                |
| ENSG00000130528 | HRC           | 1                 | 0                 | 0                 | 0                 | 0.00E+00           | -0.58                       | Down                |
| ENSG00000139329 | LUM           | 1                 | 1                 | 1                 | 0                 | 0.00E+00           | 1.81                        | Up                  |
| ENSG00000140416 | TPM1          | 1                 | 0                 | 0                 | 0                 | 0.00E+00           | -0.53                       | Down                |
| ENSG00000141905 | NFIC          | 1                 | 1                 | 0                 | 0                 | 0.00E+00           | -0.57                       | Down                |
| ENSG00000145934 | TENM2         | 1                 | 0                 | 0                 | 0                 | 0.00E+00           | -0.67                       | Down                |
| ENSG00000156219 | ART3          | 1                 | 0                 | 1                 | 0                 | 0.00E+00           | -1.31                       | Down                |
| ENSG00000161970 | RPL26         | 1                 | 0                 | 0                 | 0                 | 0.00E+00           | -0.76                       | Down                |
| ENSG00000175084 | DES           | 1                 | 1                 | 0                 | 0                 | 0.00E+00           | -0.80                       | Down                |
| ENSG00000176293 | ZNF135        | 1                 | 0                 | 0                 | 0                 | 0.00E+00           | 0.51                        | Up                  |
| ENSG00000179526 | SHARPIN       | 1                 | 0                 | 0                 | 0                 | 0.00E+00           | -0.34                       | Down                |
| ENSG00000197256 | KANK2         | 1                 | 0                 | 0                 | 0                 | 0.00E+00           | -0.57                       | Down                |
| ENSG00000197616 | MYH6          | 1                 | 0                 | 1                 | 1                 | 0.00E+00           | -2.59                       | Down                |
| ENSG00000198542 | ITGBL1        | 1                 | 1                 | 1                 | 0                 | 0.00E+00           | 1.69                        | Up                  |
| ENSG00000198624 | CCDC69        | 1                 | 0                 | 1                 | 0                 | 0.00E+00           | -0.87                       | Down                |
| ENSG00000210127 | MT-TA         | 1                 | 0                 | 1                 | 0                 | 0.00E+00           | -1.66                       | Down                |
| ENSG00000233098 | CCDC144NL-AS1 | 1                 | 1                 | 1                 | 0                 | 0.00E+00           | 1.17                        | Up                  |
| ENSG00000140319 | SRP14         | 1                 | 0                 | 0                 | 0                 | 6.91E-14           | -0.53                       | Down                |
| ENSG00000197586 | ENTPD6        | 1                 | 0                 | 1                 | 0                 | 6.91E-14           | -0.77                       | Down                |
| ENSG00000267280 | TBX2-AS1      | 1                 | 0                 | 0                 | 0                 | 6.91E-14           | 0.83                        | Up                  |
| ENSG00000152086 | TUBA3E        | 1                 | 1                 | 1                 | 0                 | 1.33E-13           | -1.99                       | Down                |
| ENSG00000170448 | NFXL1         | 1                 | 0                 | 1                 | 0                 | 1.33E-13           | -1.84                       | Down                |
| ENSG00000165124 | SVEP1         | 1                 | 1                 | 1                 | 0                 | 1.89E-13           | 1.24                        | Up                  |
| ENSG00000152580 | IGSF10        | 1                 | 1                 | 0                 | 0                 | 2.46E-13           | 1.54                        | Up                  |
| ENSG00000143603 | KCNN3         | 0                 | 1                 | 1                 | 0                 | 3.04E-13           | 1.43                        | Up                  |
| ENSG00000187837 | HIST1H1C      | 1                 | 0                 | 0                 | 0                 | 3.60E-13           | -0.89                       | Down                |
| ENSG00000075886 | TUBA3D        | 0                 | 1                 | 1                 | 0                 | 4.15E-13           | -1.60                       | Down                |
| ENSG00000189060 | H1FO          | 1                 | 1                 | 0                 | 0                 | 8.87E-13           | -0.80                       | Down                |
| ENSG00000134247 | PTGFRN        | 1                 | 0                 | 1                 | 0                 | 2.21E-12           | 0.93                        | Up                  |
| ENSG00000116690 | PRG4          | 1                 | 0                 | 1                 | 0                 | 3.94E-12           | 0.84                        | Up                  |
| ENSG00000160392 | C19orf47      | 1                 | 1                 | 1                 | 0                 | 4.61E-12           | -0.95                       | Down                |
| ENSG00000129009 | ISLR          | 0                 | 1                 | 1                 | 0                 | 7.14E-12           | 1.49                        | Up                  |
| ENSG00000129116 | PALLD         | 0                 | 1                 | 1                 | 0                 | 8.77E-12           | -0.72                       | Down                |
| ENSG00000173991 | TCAP          | 1                 | 0                 | 0                 | 0                 | 1.11E-11           | -0.55                       | Down                |

|                 |                   |   |   |   |   |          |       |      |
|-----------------|-------------------|---|---|---|---|----------|-------|------|
| ENSG00000104879 | <i>CKM</i>        | 1 | 0 | 1 | 0 | 1.27E-11 | -0.79 | Down |
| ENSG00000108298 | <i>RPL19</i>      | 1 | 0 | 0 | 0 | 1.66E-11 | -0.54 | Down |
| ENSG00000142748 | <i>FCN3</i>       | 0 | 1 | 1 | 0 | 1.75E-11 | -1.59 | Down |
| ENSG00000211455 | <i>STK38L</i>     | 1 | 1 | 1 | 0 | 2.14E-11 | 1.16  | Up   |
| ENSG00000197860 | <i>SGTB</i>       | 1 | 0 | 0 | 0 | 2.50E-11 | 0.77  | Up   |
| ENSG00000167646 | <i>DNAAF3</i>     | 1 | 0 | 0 | 0 | 4.36E-11 | 1.34  | Up   |
| ENSG00000187955 | <i>COL14A1</i>    | 0 | 1 | 1 | 0 | 4.92E-11 | 1.99  | Up   |
| ENSG00000131174 | <i>COX7B</i>      | 1 | 0 | 1 | 0 | 6.04E-11 | -1.09 | Down |
| ENSG00000143196 | <i>DPT</i>        | 0 | 1 | 1 | 0 | 6.23E-11 | 1.36  | Up   |
| ENSG00000210107 | <i>MT-TQ</i>      | 1 | 0 | 0 | 0 | 7.87E-11 | -1.08 | Down |
| ENSG00000149294 | <i>NCAM1</i>      | 1 | 1 | 0 | 0 | 1.00E-10 | -0.71 | Down |
| ENSG00000136942 | <i>RPL35</i>      | 1 | 0 | 0 | 0 | 1.08E-10 | -0.68 | Down |
| ENSG00000138326 | <i>RPS24</i>      | 1 | 0 | 0 | 0 | 1.75E-10 | -0.75 | Down |
| ENSG00000115593 | <i>SMYD1</i>      | 0 | 0 | 1 | 0 | 1.82E-10 | -0.64 | Down |
| ENSG00000177463 | <i>NR2C2</i>      | 1 | 0 | 1 | 0 | 3.54E-10 | -0.41 | Down |
| ENSG00000113296 | <i>THBS4</i>      | 1 | 0 | 1 | 0 | 3.85E-10 | 1.42  | Up   |
| ENSG00000114867 | <i>EIF4G1</i>     | 1 | 0 | 0 | 0 | 3.85E-10 | -0.66 | Down |
| ENSG00000138074 | <i>SLC5A6</i>     | 1 | 0 | 0 | 0 | 4.23E-10 | -0.40 | Down |
| ENSG00000175416 | <i>CLTB</i>       | 1 | 0 | 0 | 0 | 4.49E-10 | -0.69 | Down |
| ENSG00000106624 | <i>AEBP1</i>      | 1 | 0 | 1 | 0 | 4.52E-10 | 1.69  | Up   |
| ENSG00000136436 | <i>CALCOCO2</i>   | 1 | 1 | 1 | 0 | 5.08E-10 | -0.76 | Down |
| ENSG00000110400 | <i>NECTIN1</i>    | 1 | 1 | 1 | 0 | 5.36E-10 | -1.60 | Down |
| ENSG00000213694 | <i>S1PR3</i>      | 1 | 0 | 1 | 0 | 5.40E-10 | -1.12 | Down |
| ENSG00000096696 | <i>DSP</i>        | 1 | 0 | 0 | 0 | 5.87E-10 | -0.84 | Down |
| ENSG00000114923 | <i>SLC4A3</i>     | 1 | 0 | 0 | 0 | 6.17E-10 | -0.80 | Down |
| ENSG00000174437 | <i>ATP2A2</i>     | 1 | 0 | 1 | 0 | 6.19E-10 | -0.74 | Down |
| ENSG00000188229 | <i>TUBB4B</i>     | 1 | 0 | 1 | 0 | 8.15E-10 | -0.82 | Down |
| ENSG00000065054 | <i>SLC9A3R2</i>   | 1 | 0 | 1 | 0 | 8.20E-10 | -0.65 | Down |
| ENSG00000118564 | <i>FBXL5</i>      | 0 | 0 | 1 | 0 | 9.08E-10 | -0.52 | Down |
| ENSG00000182979 | <i>MTA1</i>       | 1 | 0 | 0 | 0 | 9.82E-10 | -0.79 | Down |
| ENSG00000171533 | <i>MAP6</i>       | 1 | 0 | 1 | 0 | 1.17E-09 | 0.65  | Up   |
| ENSG00000147872 | <i>PLIN2</i>      | 1 | 1 | 1 | 0 | 1.18E-09 | -1.38 | Down |
| ENSG00000179954 | <i>SSC5D</i>      | 0 | 1 | 1 | 0 | 1.18E-09 | 1.54  | Up   |
| ENSG00000184441 | <i>AP001062.1</i> | 1 | 0 | 0 | 0 | 1.24E-09 | 0.33  | Up   |
| ENSG00000147687 | <i>TATDN1</i>     | 1 | 0 | 0 | 0 | 1.39E-09 | -0.49 | Down |
| ENSG00000148187 | <i>MRRF</i>       | 1 | 0 | 1 | 0 | 1.61E-09 | -0.54 | Down |
| ENSG00000178685 | <i>PARP10</i>     | 1 | 1 | 1 | 0 | 1.65E-09 | 0.70  | Up   |
| ENSG00000196535 | <i>MYO18A</i>     | 1 | 0 | 0 | 0 | 1.72E-09 | -0.47 | Down |
| ENSG00000142910 | <i>TINAGL1</i>    | 1 | 0 | 1 | 0 | 1.80E-09 | -0.64 | Down |
| ENSG00000134571 | <i>MYBPC3</i>     | 1 | 0 | 0 | 0 | 1.93E-09 | -0.55 | Down |
| ENSG00000159166 | <i>LAD1</i>       | 1 | 1 | 0 | 0 | 1.93E-09 | -1.95 | Down |
| ENSG00000144857 | <i>BOC</i>        | 0 | 1 | 1 | 0 | 1.97E-09 | 0.98  | Up   |
| ENSG00000109099 | <i>PMP22</i>      | 1 | 0 | 0 | 0 | 2.60E-09 | -0.54 | Down |
| ENSG00000173402 | <i>DAG1</i>       | 1 | 1 | 0 | 0 | 2.86E-09 | -0.65 | Down |
| ENSG00000135720 | <i>DYNC1LI2</i>   | 1 | 0 | 1 | 0 | 3.77E-09 | 0.60  | Up   |
| ENSG00000087074 | <i>PPP1R15A</i>   | 1 | 0 | 0 | 0 | 3.83E-09 | 0.72  | Up   |
| ENSG00000135919 | <i>SERPINE2</i>   | 0 | 0 | 1 | 0 | 4.36E-09 | 0.90  | Up   |
| ENSG00000054654 | <i>SYNE2</i>      | 1 | 0 | 1 | 0 | 5.27E-09 | -0.80 | Down |
| ENSG00000157613 | <i>CREB3L1</i>    | 1 | 0 | 1 | 0 | 5.41E-09 | -0.79 | Down |
| ENSG00000106483 | <i>SFRP4</i>      | 0 | 0 | 1 | 0 | 6.21E-09 | 2.62  | Up   |
| ENSG00000254473 | <i>AL354920.1</i> | 1 | 0 | 0 | 0 | 6.29E-09 | 0.43  | Up   |
| ENSG00000248527 | <i>MTATP6P1</i>   | 1 | 1 | 0 | 0 | 7.06E-09 | -0.75 | Down |
| ENSG00000198763 | <i>MT-ND2</i>     | 1 | 0 | 0 | 0 | 8.19E-09 | -0.72 | Down |

|                 |                   |   |   |   |   |          |       |      |
|-----------------|-------------------|---|---|---|---|----------|-------|------|
| ENSG00000239474 | <i>KLHL41</i>     | 0 | 1 | 1 | 0 | 8.19E-09 | -0.89 | Down |
| ENSG00000120833 | <i>SOCS2</i>      | 1 | 0 | 1 | 0 | 1.01E-08 | 0.90  | Up   |
| ENSG00000078098 | <i>FAP</i>        | 0 | 0 | 1 | 0 | 1.03E-08 | 1.57  | Up   |
| ENSG00000164530 | <i>PI16</i>       | 0 | 1 | 1 | 0 | 1.33E-08 | 1.65  | Up   |
| ENSG00000185033 | <i>SEMA4B</i>     | 0 | 1 | 0 | 0 | 1.37E-08 | -0.82 | Down |
| ENSG00000090006 | <i>LTBP4</i>      | 0 | 1 | 0 | 0 | 1.42E-08 | 0.80  | Up   |
| ENSG00000182107 | <i>TMEM30B</i>    | 0 | 1 | 1 | 0 | 1.51E-08 | 1.88  | Up   |
| ENSG00000065978 | <i>YBX1</i>       | 1 | 0 | 1 | 0 | 1.59E-08 | -0.57 | Down |
| ENSG00000011028 | <i>AC080038.1</i> | 1 | 0 | 1 | 0 | 1.61E-08 | 1.26  | Up   |
| ENSG00000162576 | <i>MXRA8</i>      | 1 | 1 | 1 | 0 | 1.84E-08 | 0.91  | Up   |
| ENSG00000149575 | <i>SCN2B</i>      | 0 | 1 | 1 | 0 | 2.07E-08 | 1.04  | Up   |
| ENSG00000174348 | <i>PODN</i>       | 0 | 1 | 0 | 0 | 2.11E-08 | 1.13  | Up   |
| ENSG00000171385 | <i>KCND3</i>      | 1 | 0 | 1 | 0 | 2.40E-08 | -0.91 | Down |
| ENSG00000107404 | <i>DVL1</i>       | 1 | 0 | 1 | 0 | 2.69E-08 | -0.68 | Down |
| ENSG00000198888 | <i>MT-ND1</i>     | 1 | 0 | 1 | 0 | 2.72E-08 | -0.71 | Down |
| ENSG00000186187 | <i>ZNRF1</i>      | 1 | 0 | 0 | 0 | 2.85E-08 | -0.33 | Down |
| ENSG00000026950 | <i>BTN3A1</i>     | 0 | 1 | 0 | 0 | 2.88E-08 | 0.91  | Up   |
| ENSG00000113369 | <i>ARRDC3</i>     | 1 | 1 | 0 | 0 | 2.99E-08 | 0.96  | Up   |
| ENSG00000101825 | <i>MXRA5</i>      | 0 | 0 | 1 | 0 | 3.58E-08 | 1.59  | Up   |
| ENSG00000101187 | <i>SLCO4A1</i>    | 0 | 0 | 1 | 0 | 4.18E-08 | -1.21 | Down |
| ENSG00000120729 | <i>MYOT</i>       | 1 | 1 | 0 | 0 | 4.41E-08 | -1.30 | Down |
| ENSG00000166482 | <i>MFAP4</i>      | 1 | 1 | 1 | 0 | 4.90E-08 | 1.29  | Up   |
| ENSG00000150776 | <i>NKAPD1</i>     | 1 | 0 | 0 | 0 | 5.47E-08 | -0.47 | Down |
| ENSG00000119707 | <i>RBM25</i>      | 1 | 0 | 0 | 0 | 5.63E-08 | -0.38 | Down |
| ENSG00000167522 | <i>ANKRD11</i>    | 1 | 1 | 0 | 0 | 5.99E-08 | -0.45 | Down |
| ENSG00000063245 | <i>EPN1</i>       | 1 | 1 | 1 | 0 | 6.23E-08 | -0.79 | Down |
| ENSG00000158747 | <i>NBL1</i>       | 1 | 1 | 1 | 0 | 6.32E-08 | 1.06  | Up   |
| ENSG00000204569 | <i>PPP1R10</i>    | 0 | 0 | 1 | 0 | 6.88E-08 | 0.60  | Up   |
| ENSG00000155657 | <i>TTN</i>        | 1 | 1 | 1 | 0 | 7.45E-08 | -0.66 | Down |
| ENSG00000198517 | <i>MAFK</i>       | 1 | 0 | 1 | 0 | 7.78E-08 | 0.72  | Up   |
| ENSG00000210117 | <i>MT-TW</i>      | 1 | 0 | 1 | 0 | 9.17E-08 | -1.62 | Down |
| ENSG00000255690 | <i>TRIL</i>       | 0 | 1 | 1 | 0 | 9.35E-08 | 1.35  | Up   |
| ENSG00000160469 | <i>BRSK1</i>      | 0 | 0 | 1 | 0 | 1.06E-07 | 0.95  | Up   |
| ENSG00000182197 | <i>EXT1</i>       | 1 | 0 | 1 | 0 | 1.14E-07 | 1.11  | Up   |
| ENSG00000279088 | <i>AC022400.8</i> | 1 | 0 | 0 | 0 | 1.14E-07 | -0.58 | Down |
| ENSG00000166848 | <i>TERF2IP</i>    | 1 | 0 | 1 | 0 | 1.18E-07 | 0.47  | Up   |
| ENSG00000131730 | <i>CKMT2</i>      | 1 | 0 | 0 | 0 | 1.19E-07 | -0.62 | Down |
| ENSG00000161940 | <i>BCL6B</i>      | 1 | 1 | 1 | 0 | 1.20E-07 | 1.30  | Up   |
| ENSG00000105401 | <i>CDC37</i>      | 1 | 0 | 0 | 0 | 1.37E-07 | -0.43 | Down |
| ENSG00000020181 | <i>ADGRA2</i>     | 1 | 1 | 1 | 0 | 1.43E-07 | 0.68  | Up   |
| ENSG00000135318 | <i>NT5E</i>       | 0 | 1 | 1 | 0 | 1.46E-07 | 1.05  | Up   |
| ENSG00000110042 | <i>DTX4</i>       | 1 | 1 | 0 | 0 | 1.48E-07 | 1.25  | Up   |
| ENSG00000205363 | <i>INSYN1</i>     | 1 | 0 | 1 | 0 | 1.48E-07 | -1.08 | Down |
| ENSG00000163050 | <i>COQ8A</i>      | 1 | 0 | 1 | 0 | 1.64E-07 | -0.88 | Down |
| ENSG00000169604 | <i>ANTXR1</i>     | 0 | 1 | 1 | 0 | 1.75E-07 | 0.97  | Up   |
| ENSG00000185010 | <i>F8</i>         | 1 | 0 | 1 | 0 | 1.98E-07 | -0.71 | Down |
| ENSG00000270504 | <i>AL391422.4</i> | 1 | 0 | 1 | 0 | 1.98E-07 | 0.70  | Up   |
| ENSG00000119681 | <i>LTBP2</i>      | 0 | 0 | 1 | 0 | 2.01E-07 | 1.23  | Up   |
| ENSG00000165629 | <i>ATP5F1C</i>    | 1 | 0 | 0 | 0 | 2.20E-07 | -0.79 | Down |
| ENSG00000065882 | <i>TBC1D1</i>     | 0 | 1 | 0 | 0 | 2.40E-07 | -0.39 | Down |
| ENSG00000138303 | <i>ASCC1</i>      | 1 | 0 | 0 | 0 | 2.55E-07 | -0.38 | Down |
| ENSG00000164694 | <i>FNDC1</i>      | 1 | 1 | 1 | 0 | 2.56E-07 | 2.06  | Up   |
| ENSG00000227199 | <i>ST7-AS1</i>    | 1 | 0 | 0 | 0 | 2.56E-07 | -0.52 | Down |

|                 |                   |   |   |   |   |          |       |      |
|-----------------|-------------------|---|---|---|---|----------|-------|------|
| ENSG00000183801 | <i>OLFML1</i>     | 0 | 1 | 0 | 0 | 2.69E-07 | 0.85  | Up   |
| ENSG00000116898 | <i>MRPS15</i>     | 1 | 0 | 0 | 0 | 2.72E-07 | -0.77 | Down |
| ENSG00000225614 | <i>ZNF469</i>     | 1 | 1 | 1 | 0 | 2.87E-07 | 1.38  | Up   |
| ENSG00000134716 | <i>CYP2J2</i>     | 1 | 0 | 0 | 0 | 3.06E-07 | 0.96  | Up   |
| ENSG00000122378 | <i>PRXL2A</i>     | 0 | 0 | 1 | 0 | 3.10E-07 | -0.56 | Down |
| ENSG00000142733 | <i>MAP3K6</i>     | 0 | 1 | 1 | 0 | 3.41E-07 | -0.75 | Down |
| ENSG00000214456 | <i>PLIN5</i>      | 1 | 0 | 1 | 0 | 3.55E-07 | -1.11 | Down |
| ENSG00000120738 | <i>EGR1</i>       | 1 | 1 | 1 | 0 | 4.00E-07 | 2.10  | Up   |
| ENSG00000101444 | <i>AHCY</i>       | 1 | 0 | 1 | 0 | 4.12E-07 | -0.86 | Down |
| ENSG00000091986 | <i>CCDC80</i>     | 0 | 0 | 1 | 0 | 4.46E-07 | 1.24  | Up   |
| ENSG00000055118 | <i>KCNH2</i>      | 1 | 1 | 1 | 0 | 4.53E-07 | -0.84 | Down |
| ENSG00000144560 | <i>VGLL4</i>      | 0 | 1 | 1 | 0 | 4.85E-07 | 0.38  | Up   |
| ENSG00000198892 | <i>SHISA4</i>     | 1 | 1 | 1 | 0 | 5.82E-07 | -0.83 | Down |
| ENSG00000099139 | <i>PCSK5</i>      | 0 | 1 | 0 | 0 | 6.00E-07 | 0.73  | Up   |
| ENSG00000181104 | <i>F2R</i>        | 0 | 0 | 1 | 0 | 6.00E-07 | 0.92  | Up   |
| ENSG00000113456 | <i>RAD1</i>       | 1 | 1 | 0 | 0 | 6.66E-07 | -0.56 | Down |
| ENSG00000196821 | <i>C6orf106</i>   | 1 | 0 | 1 | 0 | 7.17E-07 | -0.50 | Down |
| ENSG00000185739 | <i>SRL</i>        | 1 | 1 | 0 | 0 | 7.23E-07 | -0.57 | Down |
| ENSG00000211445 | <i>GPX3</i>       | 1 | 1 | 1 | 0 | 7.23E-07 | -0.81 | Down |
| ENSG00000172795 | <i>DCP2</i>       | 1 | 0 | 0 | 0 | 7.30E-07 | 0.69  | Up   |
| ENSG00000076555 | <i>ACACB</i>      | 1 | 0 | 1 | 0 | 7.50E-07 | -0.87 | Down |
| ENSG00000161647 | <i>MPP3</i>       | 1 | 1 | 1 | 0 | 7.78E-07 | -1.23 | Down |
| ENSG00000187486 | <i>KCNJ11</i>     | 0 | 1 | 1 | 0 | 9.00E-07 | -1.03 | Down |
| ENSG00000261801 | <i>LOXL1-AS1</i>  | 1 | 0 | 1 | 0 | 9.55E-07 | 1.00  | Up   |
| ENSG00000173706 | <i>HEG1</i>       | 1 | 0 | 0 | 0 | 9.61E-07 | 0.64  | Up   |
| ENSG00000076344 | <i>RGS11</i>      | 1 | 0 | 1 | 0 | 1.05E-06 | 0.66  | Up   |
| ENSG00000044115 | <i>CTNNA1</i>     | 1 | 1 | 0 | 0 | 1.23E-06 | -0.57 | Down |
| ENSG00000147573 | <i>TRIM55</i>     | 1 | 0 | 0 | 0 | 1.27E-06 | -0.84 | Down |
| ENSG00000131386 | <i>GALNT15</i>    | 1 | 1 | 0 | 0 | 1.30E-06 | -1.57 | Down |
| ENSG00000166831 | <i>RBPM52</i>     | 1 | 1 | 1 | 0 | 1.36E-06 | -0.69 | Down |
| ENSG00000177731 | <i>FLII</i>       | 1 | 0 | 0 | 0 | 1.38E-06 | -0.60 | Down |
| ENSG00000232973 | <i>CYP1B1-AS1</i> | 1 | 0 | 1 | 0 | 1.40E-06 | 1.18  | Up   |
| ENSG00000214530 | <i>STARD10</i>    | 1 | 0 | 1 | 0 | 1.44E-06 | -0.86 | Down |
| ENSG00000137573 | <i>SULF1</i>      | 0 | 1 | 1 | 0 | 1.61E-06 | 1.06  | Up   |
| ENSG00000084636 | <i>COL16A1</i>    | 0 | 0 | 1 | 0 | 1.65E-06 | 0.86  | Up   |
| ENSG00000169231 | <i>THBS3</i>      | 1 | 0 | 1 | 0 | 1.65E-06 | 0.96  | Up   |
| ENSG00000105664 | <i>COMP</i>       | 0 | 0 | 1 | 0 | 1.68E-06 | 2.39  | Up   |
| ENSG00000162434 | <i>JAK1</i>       | 1 | 1 | 1 | 0 | 1.75E-06 | -0.55 | Down |
| ENSG00000133392 | <i>MYH11</i>      | 1 | 0 | 0 | 0 | 1.77E-06 | 0.56  | Up   |
| ENSG00000133477 | <i>FAM83F</i>     | 0 | 1 | 1 | 0 | 1.78E-06 | -1.15 | Down |
| ENSG00000071626 | <i>DAZAP1</i>     | 1 | 0 | 0 | 0 | 2.07E-06 | -0.71 | Down |
| ENSG00000188846 | <i>RPL14</i>      | 1 | 0 | 1 | 0 | 2.10E-06 | -0.56 | Down |
| ENSG00000210112 | <i>MT-TM</i>      | 1 | 0 | 1 | 0 | 2.25E-06 | -1.19 | Down |
| ENSG00000137818 | <i>RPLP1</i>      | 1 | 0 | 0 | 0 | 2.27E-06 | -0.61 | Down |
| ENSG00000111674 | <i>ENO2</i>       | 0 | 0 | 1 | 0 | 2.29E-06 | 0.74  | Up   |
| ENSG00000123505 | <i>AMD1</i>       | 0 | 0 | 1 | 0 | 2.40E-06 | -0.57 | Down |
| ENSG00000123240 | <i>OPTN</i>       | 1 | 0 | 0 | 0 | 2.45E-06 | -0.71 | Down |
| ENSG00000132938 | <i>MTUS2</i>      | 0 | 0 | 1 | 0 | 2.63E-06 | -0.62 | Down |
| ENSG00000161016 | <i>RPL8</i>       | 1 | 0 | 0 | 0 | 2.64E-06 | -0.60 | Down |
| ENSG00000137312 | <i>FLOT1</i>      | 1 | 0 | 0 | 0 | 2.84E-06 | -0.60 | Down |
| ENSG00000163710 | <i>PCOLCE2</i>    | 0 | 0 | 1 | 0 | 3.25E-06 | 0.77  | Up   |
| ENSG00000198959 | <i>TGM2</i>       | 1 | 1 | 0 | 0 | 3.38E-06 | -0.76 | Down |
| ENSG00000186298 | <i>PPP1CC</i>     | 1 | 0 | 1 | 0 | 3.40E-06 | -0.84 | Down |

|                 |            |   |   |   |   |          |       |      |
|-----------------|------------|---|---|---|---|----------|-------|------|
| ENSG00000168610 | STAT3      | 1 | 1 | 0 | 0 | 3.51E-06 | -0.91 | Down |
| ENSG00000111452 | ADGRD1     | 1 | 0 | 1 | 0 | 3.54E-06 | -0.77 | Down |
| ENSG00000092439 | TRPM7      | 0 | 1 | 1 | 0 | 3.57E-06 | -0.65 | Down |
| ENSG00000078804 | TP53INP2   | 1 | 0 | 0 | 0 | 3.64E-06 | 0.58  | Up   |
| ENSG00000196642 | RABL6      | 1 | 0 | 0 | 0 | 3.65E-06 | -0.26 | Down |
| ENSG00000188677 | PARVB      | 1 | 0 | 1 | 0 | 3.90E-06 | -0.81 | Down |
| ENSG00000143401 | ANP32E     | 1 | 1 | 0 | 0 | 3.94E-06 | 0.59  | Up   |
| ENSG00000167552 | TUBA1A     | 1 | 0 | 0 | 0 | 3.94E-06 | 0.56  | Up   |
| ENSG00000133065 | SLC41A1    | 1 | 0 | 1 | 0 | 4.12E-06 | -0.61 | Down |
| ENSG00000089225 | TBX5       | 1 | 0 | 0 | 0 | 4.33E-06 | -0.58 | Down |
| ENSG00000175166 | PSMD2      | 1 | 0 | 0 | 0 | 4.44E-06 | -0.45 | Down |
| ENSG00000171853 | TRAPPC12   | 1 | 0 | 0 | 0 | 4.51E-06 | -0.59 | Down |
| ENSG00000140691 | ARMC5      | 1 | 0 | 1 | 0 | 4.59E-06 | 0.48  | Up   |
| ENSG00000125827 | TMX4       | 0 | 1 | 0 | 0 | 5.10E-06 | -0.46 | Down |
| ENSG00000262655 | SPON1      | 1 | 0 | 0 | 0 | 5.10E-06 | 0.76  | Up   |
| ENSG00000104980 | TIMM44     | 1 | 0 | 1 | 0 | 5.12E-06 | -0.64 | Down |
| ENSG00000124766 | SOX4       | 0 | 1 | 0 | 0 | 5.44E-06 | 1.06  | Up   |
| ENSG00000117592 | PRDX6      | 1 | 1 | 0 | 0 | 5.47E-06 | -0.74 | Down |
| ENSG00000184489 | PTP4A3     | 1 | 0 | 1 | 0 | 5.76E-06 | -0.69 | Down |
| ENSG00000173801 | JUP        | 1 | 0 | 0 | 0 | 5.85E-06 | -0.63 | Down |
| ENSG00000068976 | PYGM       | 1 | 0 | 1 | 0 | 5.89E-06 | -0.74 | Down |
| ENSG00000128791 | TWSG1      | 1 | 0 | 1 | 0 | 6.04E-06 | 1.12  | Up   |
| ENSG00000099998 | GGT5       | 1 | 1 | 0 | 0 | 6.40E-06 | -0.95 | Down |
| ENSG00000206560 | ANKRD28    | 0 | 1 | 0 | 0 | 6.51E-06 | -0.39 | Down |
| ENSG00000100170 | SLC5A1     | 1 | 0 | 1 | 0 | 6.57E-06 | -0.86 | Down |
| ENSG00000163220 | S100A9     | 1 | 0 | 1 | 0 | 6.58E-06 | -1.55 | Down |
| ENSG00000131477 | RAMP2      | 0 | 1 | 0 | 0 | 6.59E-06 | 0.45  | Up   |
| ENSG00000125733 | TRIP10     | 1 | 0 | 0 | 0 | 7.05E-06 | -0.59 | Down |
| ENSG00000114631 | PODXL2     | 0 | 0 | 1 | 0 | 7.15E-06 | 1.10  | Up   |
| ENSG00000128309 | MPST       | 1 | 1 | 0 | 0 | 7.21E-06 | -0.96 | Down |
| ENSG00000267577 | AC010327.3 | 1 | 0 | 0 | 0 | 7.66E-06 | 1.09  | Up   |
| ENSG00000144810 | COL8A1     | 0 | 0 | 1 | 0 | 7.83E-06 | 0.77  | Up   |
| ENSG00000105953 | OGDH       | 1 | 0 | 1 | 0 | 7.85E-06 | -0.57 | Down |
| ENSG00000108592 | FTSJ3      | 1 | 0 | 0 | 0 | 7.99E-06 | -0.29 | Down |
| ENSG00000053254 | FOXN3      | 1 | 0 | 1 | 0 | 8.09E-06 | -0.65 | Down |
| ENSG00000183098 | GPC6       | 0 | 0 | 1 | 0 | 8.09E-06 | 1.46  | Up   |
| ENSG00000171552 | BCL2L1     | 0 | 1 | 1 | 0 | 8.20E-06 | -0.74 | Down |
| ENSG00000183072 | NKX2-5     | 1 | 0 | 0 | 0 | 8.22E-06 | -0.85 | Down |
| ENSG00000000971 | CFH        | 0 | 0 | 1 | 0 | 8.42E-06 | 1.14  | Up   |
| ENSG00000187840 | EIF4EBP1   | 0 | 0 | 1 | 0 | 8.55E-06 | -0.99 | Down |
| ENSG00000113657 | DPYSL3     | 0 | 1 | 1 | 0 | 8.70E-06 | 0.84  | Up   |
| ENSG00000075618 | FSCN1      | 0 | 1 | 1 | 0 | 8.97E-06 | 0.90  | Up   |
| ENSG00000051382 | PIK3CB     | 0 | 1 | 1 | 0 | 8.98E-06 | -0.36 | Down |
| ENSG00000135821 | GLUL       | 0 | 1 | 1 | 0 | 8.98E-06 | -0.55 | Down |
| ENSG00000107262 | BAG1       | 1 | 0 | 0 | 0 | 1.04E-05 | -0.53 | Down |
| ENSG00000235106 | BRD3OS     | 1 | 0 | 0 | 0 | 1.05E-05 | 0.34  | Up   |
| ENSG00000183722 | LHFPL6     | 1 | 1 | 0 | 0 | 1.10E-05 | 0.54  | Up   |
| ENSG00000118523 | CCN2       | 0 | 0 | 1 | 0 | 1.12E-05 | 1.19  | Up   |
| ENSG00000135185 | TMEM243    | 1 | 0 | 0 | 0 | 1.13E-05 | 0.46  | Up   |
| ENSG00000178814 | OPLAH      | 0 | 0 | 1 | 0 | 1.14E-05 | -0.48 | Down |
| ENSG00000164338 | UTP15      | 1 | 0 | 0 | 0 | 1.16E-05 | -0.51 | Down |
| ENSG00000270885 | RASL10B    | 0 | 0 | 1 | 0 | 1.17E-05 | -1.01 | Down |
| ENSG00000117394 | SLC2A1     | 1 | 0 | 0 | 0 | 1.30E-05 | -1.06 | Down |

|                 |                   |   |   |   |   |          |       |      |
|-----------------|-------------------|---|---|---|---|----------|-------|------|
| ENSG00000139289 | <i>PHLDA1</i>     | 1 | 0 | 0 | 0 | 1.31E-05 | 1.14  | Up   |
| ENSG00000160294 | <i>MCM3AP</i>     | 1 | 0 | 0 | 0 | 1.33E-05 | -0.44 | Down |
| ENSG00000166313 | <i>APBB1</i>      | 1 | 0 | 1 | 0 | 1.33E-05 | -0.57 | Down |
| ENSG00000100605 | <i>ITPK1</i>      | 0 | 1 | 1 | 0 | 1.35E-05 | -0.53 | Down |
| ENSG00000262049 | <i>AC139530.2</i> | 1 | 0 | 1 | 0 | 1.36E-05 | 0.35  | Up   |
| ENSG00000172458 | <i>IL17D</i>      | 0 | 0 | 1 | 0 | 1.42E-05 | 0.79  | Up   |
| ENSG00000153207 | <i>AHCTF1</i>     | 0 | 0 | 1 | 0 | 1.46E-05 | -0.58 | Down |
| ENSG00000142973 | <i>CYP4B1</i>     | 0 | 1 | 1 | 0 | 1.49E-05 | -1.56 | Down |
| ENSG00000187778 | <i>MCRS1</i>      | 1 | 0 | 1 | 0 | 1.61E-05 | -0.77 | Down |
| ENSG00000120820 | <i>GLT8D2</i>     | 0 | 1 | 0 | 0 | 1.63E-05 | 0.83  | Up   |
| ENSG00000156535 | <i>CD109</i>      | 0 | 1 | 0 | 0 | 1.63E-05 | -0.56 | Down |
| ENSG00000160801 | <i>PTH1R</i>      | 0 | 0 | 1 | 0 | 1.71E-05 | -0.75 | Down |
| ENSG00000178209 | <i>PLEC</i>       | 1 | 0 | 0 | 0 | 1.71E-05 | -0.39 | Down |
| ENSG00000073008 | <i>PVR</i>        | 1 | 0 | 1 | 0 | 1.78E-05 | -0.93 | Down |
| ENSG00000120699 | <i>EXOSC8</i>     | 1 | 0 | 0 | 0 | 1.88E-05 | 0.35  | Up   |
| ENSG00000175206 | <i>NPPA</i>       | 1 | 0 | 1 | 0 | 1.91E-05 | 1.86  | Up   |
| ENSG00000140350 | <i>ANP32A</i>     | 1 | 0 | 1 | 0 | 1.93E-05 | 0.42  | Up   |
| ENSG00000161011 | <i>SQSTM1</i>     | 1 | 0 | 1 | 0 | 1.95E-05 | 0.30  | Up   |
| ENSG00000211448 | <i>DIO2</i>       | 1 | 1 | 0 | 0 | 1.95E-05 | 1.30  | Up   |
| ENSG00000142541 | <i>RPL13A</i>     | 1 | 0 | 0 | 0 | 1.97E-05 | -0.51 | Down |
| ENSG00000236753 | <i>MKLN1-AS</i>   | 1 | 0 | 0 | 0 | 2.00E-05 | -0.72 | Down |
| ENSG00000178741 | <i>COX5A</i>      | 1 | 0 | 1 | 0 | 2.07E-05 | -0.72 | Down |
| ENSG00000130779 | <i>CLIP1</i>      | 1 | 0 | 1 | 0 | 2.14E-05 | -0.78 | Down |
| ENSG00000272288 | <i>AL451165.2</i> | 1 | 0 | 1 | 0 | 2.30E-05 | -0.35 | Down |
| ENSG00000017427 | <i>IGF1</i>       | 0 | 1 | 0 | 0 | 2.44E-05 | 0.82  | Up   |
| ENSG00000173715 | <i>C11orf80</i>   | 0 | 0 | 1 | 0 | 2.61E-05 | 1.01  | Up   |
| ENSG00000116717 | <i>GADD45A</i>    | 1 | 0 | 0 | 0 | 2.67E-05 | 0.82  | Up   |
| ENSG00000134030 | <i>CTIF</i>       | 1 | 0 | 0 | 0 | 2.67E-05 | -0.66 | Down |
| ENSG00000132329 | <i>RAMP1</i>      | 0 | 1 | 0 | 0 | 2.74E-05 | -0.83 | Down |
| ENSG00000088899 | <i>LZTS3</i>      | 0 | 0 | 1 | 0 | 2.75E-05 | -0.51 | Down |
| ENSG00000250479 | <i>CHCHD10</i>    | 1 | 0 | 0 | 0 | 2.81E-05 | -0.51 | Down |
| ENSG00000118292 | <i>C1orf54</i>    | 1 | 0 | 0 | 0 | 2.82E-05 | 0.52  | Up   |
| ENSG00000135766 | <i>EGLN1</i>      | 0 | 1 | 1 | 0 | 2.92E-05 | -0.46 | Down |
| ENSG00000175287 | <i>PHYHD1</i>     | 0 | 1 | 1 | 0 | 3.03E-05 | -0.84 | Down |
| ENSG00000092820 | <i>EZR</i>        | 1 | 1 | 0 | 0 | 3.09E-05 | -0.32 | Down |
| ENSG00000122435 | <i>TRMT13</i>     | 1 | 0 | 0 | 0 | 3.09E-05 | -0.39 | Down |
| ENSG00000144959 | <i>NCEH1</i>      | 1 | 0 | 1 | 0 | 3.25E-05 | -0.69 | Down |
| ENSG00000125378 | <i>BMP4</i>       | 0 | 1 | 1 | 0 | 3.63E-05 | 0.63  | Up   |
| ENSG00000126777 | <i>KTN1</i>       | 1 | 0 | 0 | 0 | 3.76E-05 | -0.58 | Down |
| ENSG00000166086 | <i>JAM3</i>       | 0 | 0 | 1 | 0 | 3.89E-05 | 0.47  | Up   |
| ENSG00000133026 | <i>MYH10</i>      | 0 | 0 | 1 | 0 | 3.94E-05 | 0.66  | Up   |
| ENSG00000100823 | <i>APEX1</i>      | 1 | 0 | 0 | 0 | 4.09E-05 | -0.64 | Down |
| ENSG00000237172 | <i>B3GNT9</i>     | 1 | 0 | 1 | 0 | 4.09E-05 | 0.38  | Up   |
| ENSG00000106484 | <i>MEST</i>       | 1 | 0 | 0 | 0 | 4.16E-05 | 0.55  | Up   |
| ENSG00000160888 | <i>IER2</i>       | 0 | 1 | 1 | 0 | 4.24E-05 | 0.83  | Up   |
| ENSG00000187642 | <i>PERM1</i>      | 1 | 0 | 0 | 0 | 4.30E-05 | -0.65 | Down |
| ENSG00000089157 | <i>RPLP0</i>      | 1 | 0 | 0 | 0 | 4.32E-05 | -0.92 | Down |
| ENSG00000104881 | <i>PPP1R13L</i>   | 1 | 0 | 1 | 0 | 4.38E-05 | -0.54 | Down |
| ENSG00000011295 | <i>TTC19</i>      | 1 | 0 | 0 | 0 | 4.41E-05 | -0.35 | Down |
| ENSG00000214253 | <i>FIS1</i>       | 1 | 0 | 0 | 0 | 4.50E-05 | -0.70 | Down |
| ENSG00000166685 | <i>COG1</i>       | 1 | 0 | 0 | 0 | 4.56E-05 | -0.19 | Down |
| ENSG00000110492 | <i>MDK</i>        | 0 | 1 | 1 | 0 | 4.82E-05 | 0.96  | Up   |
| ENSG00000131620 | <i>ANO1</i>       | 0 | 1 | 0 | 0 | 4.82E-05 | 0.79  | Up   |

|                 |                  |   |   |   |   |          |       |      |
|-----------------|------------------|---|---|---|---|----------|-------|------|
| ENSG00000047457 | <i>CP</i>        | 0 | 0 | 1 | 0 | 4.85E-05 | 0.77  | Up   |
| ENSG00000068878 | <i>PSME4</i>     | 0 | 1 | 0 | 0 | 4.87E-05 | -0.54 | Down |
| ENSG00000100628 | <i>ASB2</i>      | 1 | 0 | 0 | 0 | 4.87E-05 | -0.79 | Down |
| ENSG00000174444 | <i>RPL4</i>      | 1 | 0 | 0 | 0 | 4.91E-05 | -0.53 | Down |
| ENSG00000167671 | <i>UBXN6</i>     | 1 | 0 | 0 | 0 | 4.97E-05 | -0.31 | Down |
| ENSG00000114735 | <i>HEMK1</i>     | 0 | 0 | 1 | 0 | 5.02E-05 | 0.47  | Up   |
| ENSG00000055208 | <i>TAB2</i>      | 1 | 0 | 1 | 0 | 5.24E-05 | -0.85 | Down |
| ENSG00000134851 | <i>TMEM165</i>   | 1 | 0 | 0 | 0 | 5.27E-05 | -0.56 | Down |
| ENSG00000172292 | <i>CERS6</i>     | 0 | 1 | 0 | 0 | 5.27E-05 | -0.32 | Down |
| ENSG00000121413 | <i>ZSCAN18</i>   | 1 | 0 | 1 | 0 | 5.28E-05 | 0.45  | Up   |
| ENSG00000056736 | <i>IL17RB</i>    | 1 | 0 | 1 | 0 | 5.29E-05 | -1.33 | Down |
| ENSG00000100416 | <i>TRMU</i>      | 0 | 1 | 1 | 0 | 5.89E-05 | -0.41 | Down |
| ENSG00000163884 | <i>KLF15</i>     | 0 | 1 | 1 | 0 | 5.89E-05 | -0.96 | Down |
| ENSG00000198467 | <i>TPM2</i>      | 1 | 0 | 0 | 0 | 6.33E-05 | -0.44 | Down |
| ENSG00000011105 | <i>TSPAN9</i>    | 0 | 0 | 1 | 0 | 6.38E-05 | 0.55  | Up   |
| ENSG00000158246 | <i>TENT5B</i>    | 1 | 0 | 1 | 0 | 6.52E-05 | -1.22 | Down |
| ENSG00000134508 | <i>CABLES1</i>   | 0 | 1 | 0 | 0 | 7.06E-05 | 1.00  | Up   |
| ENSG00000072274 | <i>TFRC</i>      | 1 | 1 | 0 | 0 | 7.18E-05 | -1.17 | Down |
| ENSG00000113649 | <i>TCERG1</i>    | 1 | 0 | 1 | 0 | 7.38E-05 | -0.57 | Down |
| ENSG00000104177 | <i>MYEF2</i>     | 0 | 0 | 1 | 0 | 7.46E-05 | 0.73  | Up   |
| ENSG00000153132 | <i>CLGN</i>      | 1 | 0 | 0 | 0 | 7.56E-05 | -0.69 | Down |
| ENSG00000235387 | <i>SPAAR</i>     | 0 | 0 | 1 | 0 | 7.82E-05 | -0.71 | Down |
| ENSG00000189058 | <i>APOD</i>      | 1 | 0 | 0 | 0 | 8.18E-05 | -1.01 | Down |
| ENSG00000176463 | <i>SLCO3A1</i>   | 1 | 0 | 0 | 0 | 8.36E-05 | -0.60 | Down |
| ENSG00000168653 | <i>NDUFS5</i>    | 1 | 0 | 1 | 0 | 8.40E-05 | -0.59 | Down |
| ENSG00000118495 | <i>PLAGL1</i>    | 0 | 1 | 1 | 0 | 8.46E-05 | 0.64  | Up   |
| ENSG00000124172 | <i>ATP5F1E</i>   | 1 | 0 | 0 | 0 | 8.49E-05 | -0.66 | Down |
| ENSG00000188257 | <i>PLA2G2A</i>   | 1 | 0 | 0 | 0 | 8.91E-05 | -1.83 | Down |
| ENSG00000156050 | <i>FAM161B</i>   | 1 | 0 | 1 | 0 | 9.04E-05 | 0.35  | Up   |
| ENSG00000166913 | <i>YWHAB</i>     | 1 | 0 | 0 | 0 | 9.04E-05 | 0.48  | Up   |
| ENSG00000248923 | <i>MTND5P11</i>  | 1 | 0 | 0 | 0 | 9.21E-05 | -1.12 | Down |
| ENSG00000231711 | <i>LINC00899</i> | 0 | 0 | 1 | 0 | 9.25E-05 | 0.62  | Up   |
| ENSG00000134046 | <i>MBD2</i>      | 1 | 1 | 0 | 0 | 9.28E-05 | -0.71 | Down |
| ENSG00000132507 | <i>EIF5A</i>     | 1 | 0 | 0 | 0 | 9.36E-05 | -0.44 | Down |
| ENSG00000154642 | <i>C21orf91</i>  | 1 | 0 | 1 | 0 | 9.60E-05 | 1.04  | Up   |
| ENSG00000060138 | <i>YBX3</i>      | 0 | 1 | 0 | 0 | 9.70E-05 | -0.49 | Down |
| ENSG00000140564 | <i>FURIN</i>     | 1 | 1 | 0 | 0 | 9.81E-05 | -0.66 | Down |
| ENSG00000235505 | <i>CASP17P</i>   | 1 | 0 | 1 | 0 | 9.87E-05 | 1.33  | Up   |
| ENSG00000167315 | <i>ACAA2</i>     | 1 | 0 | 1 | 0 | 1.09E-04 | -0.80 | Down |
| ENSG00000008513 | <i>ST3GAL1</i>   | 1 | 1 | 0 | 0 | 1.14E-04 | -0.58 | Down |
| ENSG00000176971 | <i>FIBIN</i>     | 0 | 0 | 1 | 0 | 1.14E-04 | 0.86  | Up   |
| ENSG00000205726 | <i>ITSN1</i>     | 1 | 0 | 0 | 0 | 1.16E-04 | -0.44 | Down |
| ENSG00000160685 | <i>ZBTB7B</i>    | 1 | 0 | 0 | 0 | 1.19E-04 | -0.85 | Down |
| ENSG00000071242 | <i>RPS6KA2</i>   | 0 | 1 | 0 | 0 | 1.22E-04 | -0.54 | Down |
| ENSG00000163638 | <i>ADAMTS9</i>   | 0 | 1 | 1 | 0 | 1.25E-04 | -0.78 | Down |
| ENSG00000152642 | <i>GPD1L</i>     | 1 | 0 | 1 | 0 | 1.26E-04 | -0.75 | Down |
| ENSG00000120910 | <i>PPP3CC</i>    | 0 | 1 | 0 | 0 | 1.28E-04 | -0.63 | Down |
| ENSG00000205336 | <i>ADGRG1</i>    | 0 | 0 | 1 | 0 | 1.28E-04 | -0.27 | Down |
| ENSG00000092054 | <i>MYH7</i>      | 1 | 0 | 0 | 0 | 1.28E-04 | -0.45 | Down |
| ENSG00000109339 | <i>MAPK10</i>    | 0 | 1 | 1 | 0 | 1.28E-04 | 0.76  | Up   |
| ENSG00000083845 | <i>RPS5</i>      | 1 | 0 | 0 | 0 | 1.31E-04 | -0.71 | Down |
| ENSG00000102466 | <i>FGF14</i>     | 1 | 0 | 1 | 0 | 1.34E-04 | 0.79  | Up   |
| ENSG00000109610 | <i>SOD3</i>      | 0 | 0 | 1 | 0 | 1.36E-04 | 0.77  | Up   |

|                 |                    |   |   |   |   |          |       |      |
|-----------------|--------------------|---|---|---|---|----------|-------|------|
| ENSG00000118898 | <i>PPL</i>         | 0 | 0 | 1 | 0 | 1.41E-04 | -0.48 | Down |
| ENSG00000173641 | <i>HSPB7</i>       | 1 | 0 | 0 | 0 | 1.41E-04 | -0.45 | Down |
| ENSG00000173545 | <i>ZNF622</i>      | 1 | 1 | 0 | 0 | 1.45E-04 | -0.63 | Down |
| ENSG00000165887 | <i>ANKRD2</i>      | 1 | 0 | 1 | 0 | 1.46E-04 | -1.39 | Down |
| ENSG00000136925 | <i>TSTD2</i>       | 1 | 0 | 0 | 0 | 1.47E-04 | -0.24 | Down |
| ENSG00000173272 | <i>MZT2A</i>       | 1 | 0 | 1 | 0 | 1.47E-04 | -0.69 | Down |
| ENSG00000155096 | <i>AZIN1</i>       | 1 | 0 | 1 | 0 | 1.48E-04 | 0.55  | Up   |
| ENSG00000119650 | <i>IFT43</i>       | 0 | 0 | 1 | 0 | 1.50E-04 | 0.64  | Up   |
| ENSG00000186340 | <i>THBS2</i>       | 0 | 0 | 1 | 0 | 1.57E-04 | 0.80  | Up   |
| ENSG00000128591 | <i>FLNC</i>        | 1 | 0 | 0 | 0 | 1.67E-04 | -0.85 | Down |
| ENSG00000142409 | <i>ZNF787</i>      | 0 | 0 | 1 | 0 | 1.74E-04 | -0.64 | Down |
| ENSG00000184205 | <i>TSPYL2</i>      | 0 | 1 | 0 | 0 | 1.75E-04 | -0.66 | Down |
| ENSG00000187147 | <i>RNF220</i>      | 1 | 0 | 0 | 0 | 1.81E-04 | -0.36 | Down |
| ENSG00000137076 | <i>TLN1</i>        | 1 | 0 | 0 | 0 | 1.87E-04 | -0.47 | Down |
| ENSG00000161649 | <i>CD300LG</i>     | 0 | 0 | 1 | 0 | 1.87E-04 | -0.71 | Down |
| ENSG00000178585 | <i>CTNNBIP1</i>    | 0 | 0 | 1 | 0 | 1.91E-04 | -0.82 | Down |
| ENSG00000260807 | <i>AC009041.2</i>  | 1 | 0 | 1 | 0 | 1.98E-04 | 1.32  | Up   |
| ENSG00000137547 | <i>MRPL15</i>      | 1 | 0 | 0 | 0 | 1.99E-04 | -0.70 | Down |
| ENSG00000115380 | <i>EFEMP1</i>      | 0 | 1 | 1 | 0 | 2.04E-04 | 0.90  | Up   |
| ENSG00000140829 | <i>DHX38</i>       | 0 | 1 | 0 | 0 | 2.12E-04 | -0.41 | Down |
| ENSG00000128918 | <i>ALDH1A2</i>     | 0 | 1 | 0 | 0 | 2.13E-04 | 0.80  | Up   |
| ENSG00000005844 | <i>ITGAL</i>       | 0 | 1 | 0 | 0 | 2.17E-04 | 0.97  | Up   |
| ENSG00000164932 | <i>CTHRC1</i>      | 0 | 1 | 1 | 0 | 2.18E-04 | 1.44  | Up   |
| ENSG00000125743 | <i>SNRPD2</i>      | 1 | 0 | 0 | 0 | 2.19E-04 | -0.59 | Down |
| ENSG00000130159 | <i>ECSIT</i>       | 1 | 0 | 1 | 0 | 2.25E-04 | -0.59 | Down |
| ENSG00000160959 | <i>LRRC14</i>      | 1 | 0 | 0 | 0 | 2.37E-04 | 0.36  | Up   |
| ENSG00000123096 | <i>SSPN</i>        | 0 | 0 | 1 | 0 | 2.40E-04 | 0.33  | Up   |
| ENSG00000162882 | <i>HAAO</i>        | 0 | 0 | 1 | 0 | 2.49E-04 | 1.32  | Up   |
| ENSG00000124701 | <i>APOBEC2</i>     | 1 | 0 | 1 | 0 | 2.58E-04 | -0.69 | Down |
| ENSG00000141965 | <i>FEM1A</i>       | 1 | 0 | 0 | 0 | 2.58E-04 | -0.73 | Down |
| ENSG00000173457 | <i>PPP1R14B</i>    | 1 | 0 | 0 | 0 | 2.62E-04 | -0.88 | Down |
| ENSG00000186350 | <i>RXRA</i>        | 1 | 0 | 1 | 0 | 2.63E-04 | -0.55 | Down |
| ENSG00000138592 | <i>USP8</i>        | 1 | 0 | 1 | 0 | 2.67E-04 | -0.37 | Down |
| ENSG00000164050 | <i>PLXNB1</i>      | 0 | 0 | 1 | 0 | 2.67E-04 | -0.55 | Down |
| ENSG00000188783 | <i>PRELP</i>       | 0 | 0 | 1 | 0 | 2.72E-04 | 0.80  | Up   |
| ENSG00000170142 | <i>UBE2E1</i>      | 1 | 0 | 0 | 0 | 2.75E-04 | -0.29 | Down |
| ENSG00000176597 | <i>B3GNT5</i>      | 0 | 1 | 1 | 0 | 2.76E-04 | 0.90  | Up   |
| ENSG00000144218 | <i>AFF3</i>        | 0 | 1 | 0 | 0 | 2.78E-04 | 0.71  | Up   |
| ENSG00000160113 | <i>NR2F6</i>       | 1 | 0 | 1 | 0 | 2.87E-04 | -0.61 | Down |
| ENSG00000141736 | <i>ERBB2</i>       | 1 | 0 | 0 | 0 | 2.91E-04 | -0.39 | Down |
| ENSG00000237945 | <i>LINC00649</i>   | 1 | 0 | 1 | 0 | 2.92E-04 | -0.64 | Down |
| ENSG00000170962 | <i>PDGFD</i>       | 1 | 0 | 0 | 0 | 3.01E-04 | 0.97  | Up   |
| ENSG00000077942 | <i>FBLN1</i>       | 0 | 1 | 1 | 0 | 3.01E-04 | 1.03  | Up   |
| ENSG00000176485 | <i>PLA2G16</i>     | 1 | 0 | 0 | 0 | 3.25E-04 | -0.73 | Down |
| ENSG00000224699 | <i>LAMTOR5-AS1</i> | 1 | 0 | 0 | 0 | 3.30E-04 | -0.77 | Down |
| ENSG00000146147 | <i>MLIP</i>        | 1 | 0 | 1 | 0 | 3.48E-04 | -0.77 | Down |
| ENSG00000143515 | <i>ATP8B2</i>      | 1 | 0 | 1 | 0 | 3.63E-04 | 0.87  | Up   |
| ENSG00000143995 | <i>MEIS1</i>       | 0 | 1 | 0 | 0 | 3.64E-04 | -0.50 | Down |
| ENSG00000066855 | <i>MTFR1</i>       | 1 | 0 | 1 | 0 | 3.66E-04 | -0.49 | Down |
| ENSG00000187079 | <i>TEAD1</i>       | 1 | 0 | 1 | 0 | 3.81E-04 | -0.73 | Down |
| ENSG00000107036 | <i>RIC1</i>        | 1 | 0 | 0 | 0 | 3.81E-04 | -0.46 | Down |
| ENSG00000171608 | <i>PIK3CD</i>      | 1 | 0 | 0 | 0 | 3.84E-04 | 0.36  | Up   |
| ENSG00000130300 | <i>PLVAP</i>       | 0 | 0 | 1 | 0 | 3.94E-04 | 0.69  | Up   |



|                 |                 |   |   |   |   |          |       |      |
|-----------------|-----------------|---|---|---|---|----------|-------|------|
| ENSG0000014216  | <i>CAPN1</i>    | 1 | 0 | 0 | 0 | 4.08E-04 | -0.41 | Down |
| ENSG00000159167 | <i>STC1</i>     | 0 | 0 | 1 | 0 | 4.09E-04 | 1.41  | Up   |
| ENSG00000168309 | <i>FAM107A</i>  | 0 | 0 | 1 | 0 | 4.09E-04 | -0.62 | Down |
| ENSG00000158417 | <i>EIF5B</i>    | 1 | 0 | 0 | 0 | 4.10E-04 | -0.51 | Down |
| ENSG00000161381 | <i>PLXDC1</i>   | 0 | 1 | 1 | 0 | 4.12E-04 | 0.65  | Up   |
| ENSG00000172164 | <i>SNTB1</i>    | 0 | 1 | 0 | 0 | 4.25E-04 | 0.55  | Up   |
| ENSG00000119242 | <i>CCDC92</i>   | 1 | 0 | 0 | 0 | 4.63E-04 | -0.48 | Down |
| ENSG00000215375 | <i>MYL5</i>     | 1 | 0 | 0 | 0 | 4.63E-04 | -0.27 | Down |
| ENSG00000170734 | <i>POLH</i>     | 1 | 0 | 0 | 0 | 4.71E-04 | 0.45  | Up   |
| ENSG00000079215 | <i>SLC1A3</i>   | 0 | 1 | 1 | 0 | 4.75E-04 | -0.47 | Down |
| ENSG00000100106 | <i>TRIOBP</i>   | 1 | 0 | 0 | 0 | 4.80E-04 | -0.48 | Down |
| ENSG00000182162 | <i>P2RY8</i>    | 1 | 1 | 0 | 0 | 4.80E-04 | 1.21  | Up   |
| ENSG00000176658 | <i>MYO1D</i>    | 0 | 0 | 1 | 0 | 4.82E-04 | 0.82  | Up   |
| ENSG00000166484 | <i>MAPK7</i>    | 1 | 0 | 0 | 0 | 4.83E-04 | 0.62  | Up   |
| ENSG00000127418 | <i>FGFRL1</i>   | 1 | 1 | 0 | 0 | 4.83E-04 | -0.77 | Down |
| ENSG00000131899 | <i>LLGL1</i>    | 1 | 0 | 0 | 0 | 4.99E-04 | 0.44  | Up   |
| ENSG00000225526 | <i>MKRN2OS</i>  | 0 | 0 | 1 | 0 | 5.00E-04 | 1.28  | Up   |
| ENSG00000110811 | <i>P3H3</i>     | 0 | 1 | 0 | 0 | 5.05E-04 | 0.59  | Up   |
| ENSG00000095203 | <i>EPB41L4B</i> | 0 | 0 | 1 | 0 | 5.11E-04 | -0.73 | Down |
| ENSG00000160949 | <i>TONSL</i>    | 1 | 0 | 0 | 0 | 5.15E-04 | 0.52  | Up   |
| ENSG00000113083 | <i>LOX</i>      | 1 | 0 | 1 | 0 | 5.16E-04 | 0.85  | Up   |
| ENSG00000137309 | <i>HMGA1</i>    | 1 | 0 | 0 | 0 | 5.28E-04 | -0.57 | Down |
| ENSG00000101210 | <i>EEF1A2</i>   | 1 | 0 | 0 | 0 | 5.33E-04 | -0.35 | Down |
| ENSG00000151503 | <i>NCAPD3</i>   | 1 | 0 | 0 | 0 | 5.43E-04 | 0.22  | Up   |
| ENSG00000167106 | <i>FAM102A</i>  | 0 | 0 | 1 | 0 | 5.47E-04 | 0.69  | Up   |
| ENSG00000111341 | <i>MGP</i>      | 0 | 0 | 1 | 0 | 5.63E-04 | 0.62  | Up   |
| ENSG00000147679 | <i>UTP23</i>    | 1 | 0 | 0 | 0 | 5.63E-04 | -0.25 | Down |
| ENSG00000072864 | <i>NDE1</i>     | 1 | 0 | 0 | 0 | 5.63E-04 | 0.56  | Up   |
| ENSG00000177098 | <i>SCN4B</i>    | 0 | 1 | 0 | 0 | 5.72E-04 | 0.62  | Up   |
| ENSG00000137776 | <i>SLTM</i>     | 1 | 0 | 0 | 0 | 5.74E-04 | -0.49 | Down |
| ENSG00000162191 | <i>UBXN1</i>    | 1 | 0 | 0 | 0 | 5.93E-04 | -0.56 | Down |
| ENSG00000197893 | <i>NRAP</i>     | 1 | 0 | 0 | 0 | 5.98E-04 | -0.65 | Down |
| ENSG00000198771 | <i>RCSD1</i>    | 1 | 0 | 1 | 0 | 5.98E-04 | -0.46 | Down |
| ENSG00000124588 | <i>NQO2</i>     | 1 | 0 | 1 | 0 | 6.00E-04 | -0.73 | Down |
| ENSG00000103335 | <i>PIEZO1</i>   | 1 | 0 | 0 | 0 | 6.09E-04 | 0.36  | Up   |
| ENSG00000188176 | <i>SMTNL2</i>   | 0 | 0 | 1 | 0 | 6.17E-04 | -0.84 | Down |
| ENSG00000100023 | <i>PPIL2</i>    | 1 | 0 | 0 | 0 | 6.24E-04 | 0.31  | Up   |
| ENSG00000105357 | <i>MYH14</i>    | 1 | 0 | 0 | 0 | 6.40E-04 | -0.54 | Down |
| ENSG00000104853 | <i>CLPTM1</i>   | 1 | 0 | 0 | 0 | 6.65E-04 | -0.37 | Down |
| ENSG00000112306 | <i>RPS12</i>    | 1 | 0 | 0 | 0 | 6.68E-04 | -0.86 | Down |
| ENSG00000167815 | <i>PRDX2</i>    | 1 | 0 | 0 | 0 | 6.78E-04 | -0.66 | Down |
| ENSG00000144034 | <i>TPRKB</i>    | 0 | 0 | 1 | 0 | 6.89E-04 | -0.38 | Down |
| ENSG00000142188 | <i>TMEM50B</i>  | 1 | 0 | 0 | 0 | 7.07E-04 | 0.29  | Up   |
| ENSG00000165795 | <i>NDRG2</i>    | 0 | 0 | 1 | 0 | 7.15E-04 | -0.29 | Down |
| ENSG00000120594 | <i>PLXDC2</i>   | 0 | 0 | 1 | 0 | 7.18E-04 | 0.60  | Up   |
| ENSG00000140199 | <i>SLC12A6</i>  | 1 | 0 | 0 | 0 | 7.26E-04 | -0.25 | Down |
| ENSG00000277494 | <i>GPIHBP1</i>  | 0 | 0 | 1 | 0 | 7.52E-04 | -0.60 | Down |
| ENSG00000235535 | <i>TRDN-AS1</i> | 1 | 0 | 0 | 0 | 7.85E-04 | -0.45 | Down |
| ENSG00000197912 | <i>SPG7</i>     | 1 | 0 | 1 | 0 | 8.00E-04 | -0.41 | Down |
| ENSG00000171517 | <i>LPAR3</i>    | 0 | 0 | 0 | 0 | 8.64E-04 | -1.16 | Down |
| ENSG00000163513 | <i>TGFBR2</i>   | 0 | 0 | 1 | 0 | 8.77E-04 | -0.41 | Down |
| ENSG00000136111 | <i>TBC1D4</i>   | 1 | 0 | 1 | 0 | 8.77E-04 | -0.64 | Down |
| ENSG00000142279 | <i>WTIP</i>     | 0 | 1 | 1 | 0 | 8.85E-04 | 0.80  | Up   |

|                 |                   |   |   |   |   |          |       |      |
|-----------------|-------------------|---|---|---|---|----------|-------|------|
| ENSG00000166002 | <i>SMCO4</i>      | 1 | 0 | 0 | 0 | 8.86E-04 | -0.82 | Down |
| ENSG00000113555 | <i>PCDH12</i>     | 0 | 1 | 0 | 0 | 8.97E-04 | 0.48  | Up   |
| ENSG00000197448 | <i>GSTK1</i>      | 1 | 0 | 1 | 0 | 9.05E-04 | -0.40 | Down |
| ENSG00000101421 | <i>CHMP4B</i>     | 1 | 0 | 0 | 0 | 9.14E-04 | -0.51 | Down |
| ENSG00000108387 | <i>SEPT4</i>      | 1 | 1 | 0 | 0 | 9.30E-04 | -0.65 | Down |
| ENSG00000106538 | <i>RARRES2</i>    | 0 | 1 | 0 | 0 | 9.31E-04 | 1.06  | Up   |
| ENSG00000170921 | <i>TANC2</i>      | 0 | 0 | 1 | 0 | 9.48E-04 | 0.43  | Up   |
| ENSG00000126749 | <i>EMG1</i>       | 0 | 0 | 1 | 0 | 9.59E-04 | -0.30 | Down |
| ENSG00000245293 | <i>AC096564.1</i> | 1 | 0 | 0 | 0 | 9.76E-04 | -0.68 | Down |
| ENSG00000142856 | <i>ITGB3BP</i>    | 0 | 0 | 1 | 0 | 1.01E-03 | -0.40 | Down |
| ENSG00000116473 | <i>RAP1A</i>      | 0 | 1 | 0 | 0 | 1.02E-03 | -0.33 | Down |
| ENSG00000172057 | <i>ORMDL3</i>     | 0 | 0 | 1 | 0 | 1.02E-03 | 0.41  | Up   |
| ENSG00000005436 | <i>GCFC2</i>      | 0 | 1 | 1 | 0 | 1.03E-03 | -0.38 | Down |
| ENSG00000160539 | <i>PLPP7</i>      | 1 | 0 | 1 | 0 | 1.05E-03 | -0.66 | Down |
| ENSG00000159199 | <i>ATP5MC1</i>    | 1 | 0 | 1 | 0 | 1.05E-03 | -0.90 | Down |
| ENSG00000084754 | <i>HADHA</i>      | 0 | 0 | 1 | 0 | 1.06E-03 | -0.39 | Down |
| ENSG00000169184 | <i>MN1</i>        | 0 | 0 | 1 | 0 | 1.07E-03 | 0.70  | Up   |
| ENSG00000100211 | <i>CBY1</i>       | 1 | 0 | 0 | 0 | 1.07E-03 | 0.29  | Up   |
| ENSG00000163328 | <i>GPR155</i>     | 0 | 0 | 1 | 0 | 1.08E-03 | -0.40 | Down |
| ENSG00000102225 | <i>CDK16</i>      | 1 | 0 | 0 | 0 | 1.09E-03 | -0.54 | Down |
| ENSG00000119285 | <i>HEATR1</i>     | 1 | 0 | 0 | 0 | 1.09E-03 | -0.31 | Down |
| ENSG00000087245 | <i>MMP2</i>       | 0 | 1 | 0 | 0 | 1.10E-03 | 0.71  | Up   |
| ENSG00000119487 | <i>MAPKAP1</i>    | 0 | 0 | 1 | 0 | 1.10E-03 | -0.42 | Down |
| ENSG00000186174 | <i>BCL9L</i>      | 1 | 0 | 0 | 0 | 1.11E-03 | -0.74 | Down |
| ENSG00000100296 | <i>THOC5</i>      | 1 | 1 | 0 | 0 | 1.14E-03 | -0.68 | Down |
| ENSG00000175110 | <i>MRPS22</i>     | 1 | 0 | 0 | 0 | 1.14E-03 | -0.21 | Down |
| ENSG00000140941 | <i>MAP1LC3B</i>   | 1 | 0 | 0 | 0 | 1.18E-03 | -0.53 | Down |
| ENSG00000126581 | <i>BECN1</i>      | 1 | 0 | 0 | 0 | 1.18E-03 | -0.57 | Down |
| ENSG00000130725 | <i>UBE2M</i>      | 1 | 0 | 0 | 0 | 1.18E-03 | -0.51 | Down |
| ENSG00000072840 | <i>EVC</i>        | 0 | 1 | 0 | 0 | 1.25E-03 | 0.66  | Up   |
| ENSG00000077684 | <i>JADE1</i>      | 0 | 1 | 0 | 0 | 1.28E-03 | -0.27 | Down |
| ENSG00000120053 | <i>GOT1</i>       | 1 | 0 | 0 | 0 | 1.28E-03 | -0.54 | Down |
| ENSG00000197077 | <i>KIAA1671</i>   | 1 | 1 | 0 | 0 | 1.28E-03 | 0.65  | Up   |
| ENSG00000178605 | <i>GTPBP6</i>     | 0 | 0 | 1 | 0 | 1.28E-03 | -0.47 | Down |
| ENSG00000124562 | <i>SNRPC</i>      | 1 | 0 | 1 | 0 | 1.29E-03 | -0.63 | Down |
| ENSG00000176407 | <i>KCMF1</i>      | 0 | 1 | 0 | 0 | 1.29E-03 | -0.42 | Down |
| ENSG00000228794 | <i>LINC01128</i>  | 0 | 0 | 1 | 0 | 1.30E-03 | -0.37 | Down |
| ENSG00000110092 | <i>CCND1</i>      | 0 | 0 | 1 | 0 | 1.30E-03 | 0.35  | Up   |
| ENSG00000164142 | <i>FAM160A1</i>   | 0 | 1 | 0 | 0 | 1.32E-03 | -0.49 | Down |
| ENSG00000141447 | <i>OSBPL1A</i>    | 1 | 0 | 1 | 0 | 1.32E-03 | -0.40 | Down |
| ENSG00000172349 | <i>IL16</i>       | 0 | 1 | 0 | 0 | 1.32E-03 | 0.61  | Up   |
| ENSG00000123144 | <i>TRIR</i>       | 1 | 0 | 0 | 0 | 1.33E-03 | -0.53 | Down |
| ENSG00000136870 | <i>ZNF189</i>     | 1 | 0 | 0 | 0 | 1.33E-03 | -1.05 | Down |
| ENSG00000072163 | <i>LIMS2</i>      | 0 | 0 | 1 | 0 | 1.36E-03 | -0.25 | Down |
| ENSG00000142937 | <i>RPS8</i>       | 1 | 0 | 0 | 0 | 1.47E-03 | -0.50 | Down |
| ENSG00000111728 | <i>ST8SIA1</i>    | 0 | 1 | 0 | 0 | 1.53E-03 | 0.89  | Up   |
| ENSG00000175220 | <i>ARHGAP1</i>    | 0 | 0 | 1 | 0 | 1.59E-03 | 0.43  | Up   |
| ENSG00000221983 | <i>UBA52</i>      | 1 | 0 | 0 | 0 | 1.61E-03 | -0.69 | Down |
| ENSG00000174502 | <i>SLC26A9</i>    | 0 | 0 | 1 | 0 | 1.63E-03 | -0.55 | Down |
| ENSG00000134755 | <i>DSC2</i>       | 0 | 0 | 1 | 0 | 1.66E-03 | -0.58 | Down |
| ENSG00000005448 | <i>WDR54</i>      | 1 | 0 | 0 | 0 | 1.70E-03 | 0.72  | Up   |
| ENSG00000099875 | <i>MKNK2</i>      | 1 | 0 | 0 | 0 | 1.74E-03 | -0.75 | Down |
| ENSG00000146242 | <i>TPBG</i>       | 0 | 1 | 0 | 0 | 1.75E-03 | 0.73  | Up   |

|                 |                   |   |   |   |   |          |       |      |
|-----------------|-------------------|---|---|---|---|----------|-------|------|
| ENSG00000127663 | <i>KDM4B</i>      | 1 | 0 | 1 | 0 | 1.76E-03 | -0.55 | Down |
| ENSG00000186591 | <i>UBE2H</i>      | 1 | 0 | 1 | 0 | 1.76E-03 | 0.42  | Up   |
| ENSG00000148498 | <i>PARD3</i>      | 0 | 1 | 0 | 0 | 1.78E-03 | -0.50 | Down |
| ENSG00000256043 | <i>CTSO</i>       | 0 | 1 | 0 | 0 | 1.81E-03 | 0.61  | Up   |
| ENSG00000070778 | <i>AL162171.1</i> | 0 | 1 | 0 | 0 | 1.82E-03 | 0.35  | Up   |
| ENSG00000089199 | <i>CHGB</i>       | 1 | 0 | 0 | 0 | 1.83E-03 | -1.55 | Down |
| ENSG00000116260 | <i>QSOX1</i>      | 1 | 1 | 0 | 0 | 1.85E-03 | -0.77 | Down |
| ENSG00000196531 | <i>NACA</i>       | 1 | 0 | 0 | 0 | 1.86E-03 | -0.53 | Down |
| ENSG00000178982 | <i>EIF3K</i>      | 1 | 0 | 0 | 0 | 1.87E-03 | -0.60 | Down |
| ENSG00000100393 | <i>EP300</i>      | 1 | 0 | 0 | 0 | 1.90E-03 | -0.43 | Down |
| ENSG00000007080 | <i>CCDC124</i>    | 1 | 0 | 0 | 0 | 1.90E-03 | -0.43 | Down |
| ENSG00000203734 | <i>ECT2L</i>      | 1 | 0 | 1 | 0 | 1.91E-03 | 1.07  | Up   |
| ENSG00000074219 | <i>TEAD2</i>      | 0 | 0 | 1 | 0 | 1.92E-03 | -0.51 | Down |
| ENSG00000188735 | <i>TMEM120B</i>   | 1 | 0 | 0 | 0 | 1.92E-03 | -0.49 | Down |
| ENSG00000198932 | <i>GPRASP1</i>    | 0 | 0 | 1 | 0 | 1.93E-03 | 0.66  | Up   |
| ENSG00000121281 | <i>ADCY7</i>      | 1 | 0 | 0 | 0 | 2.00E-03 | 0.56  | Up   |
| ENSG00000104635 | <i>SLC39A14</i>   | 0 | 1 | 0 | 0 | 2.04E-03 | -0.57 | Down |
| ENSG00000079805 | <i>DNM2</i>       | 0 | 0 | 1 | 0 | 2.08E-03 | -0.24 | Down |
| ENSG00000182154 | <i>MRPL41</i>     | 1 | 0 | 1 | 0 | 2.11E-03 | -0.58 | Down |
| ENSG00000149970 | <i>CNKSR2</i>     | 1 | 0 | 1 | 0 | 2.12E-03 | 0.92  | Up   |
| ENSG00000184076 | <i>UQCR10</i>     | 1 | 0 | 0 | 0 | 2.19E-03 | -0.55 | Down |
| ENSG00000178607 | <i>ERN1</i>       | 0 | 0 | 0 | 0 | 2.24E-03 | 0.88  | Up   |
| ENSG00000245105 | <i>A2M-AS1</i>    | 1 | 0 | 0 | 0 | 2.25E-03 | 0.33  | Up   |
| ENSG00000143149 | <i>ALDH9A1</i>    | 1 | 0 | 0 | 0 | 2.29E-03 | 0.53  | Up   |
| ENSG00000197622 | <i>CDC42SE1</i>   | 1 | 0 | 1 | 0 | 2.36E-03 | 0.38  | Up   |
| ENSG00000031081 | <i>ARHGAP31</i>   | 0 | 0 | 1 | 0 | 2.40E-03 | -0.43 | Down |
| ENSG00000110697 | <i>PITPNM1</i>    | 1 | 0 | 0 | 0 | 2.42E-03 | -0.72 | Down |
| ENSG00000204463 | <i>BAG6</i>       | 1 | 0 | 0 | 0 | 2.48E-03 | -0.40 | Down |
| ENSG00000172831 | <i>CES2</i>       | 1 | 0 | 0 | 0 | 2.53E-03 | -0.62 | Down |
| ENSG00000128731 | <i>HERC2</i>      | 1 | 0 | 0 | 0 | 2.65E-03 | -0.54 | Down |
| ENSG00000174231 | <i>PRPF8</i>      | 1 | 0 | 0 | 0 | 2.76E-03 | -0.41 | Down |
| ENSG00000018280 | <i>SLC11A1</i>    | 0 | 1 | 0 | 0 | 2.84E-03 | -1.31 | Down |
| ENSG00000130560 | <i>UBAC1</i>      | 1 | 0 | 0 | 0 | 2.85E-03 | -0.60 | Down |
| ENSG00000171863 | <i>RPS7</i>       | 1 | 0 | 0 | 0 | 2.94E-03 | -0.93 | Down |
| ENSG00000176946 | <i>THAP4</i>      | 1 | 0 | 1 | 0 | 2.94E-03 | -0.51 | Down |
| ENSG00000145725 | <i>PIIP5K2</i>    | 0 | 0 | 1 | 0 | 2.98E-03 | -0.78 | Down |
| ENSG00000197852 | <i>INKA2</i>      | 0 | 1 | 1 | 0 | 2.98E-03 | -0.43 | Down |
| ENSG00000121022 | <i>COPSS5</i>     | 1 | 0 | 0 | 0 | 3.04E-03 | -0.49 | Down |
| ENSG00000137752 | <i>CASP1</i>      | 0 | 1 | 1 | 0 | 3.05E-03 | 0.80  | Up   |
| ENSG00000235750 | <i>KIAA0040</i>   | 0 | 0 | 1 | 0 | 3.06E-03 | -0.62 | Down |
| ENSG00000103363 | <i>ELOB</i>       | 1 | 0 | 0 | 0 | 3.08E-03 | -0.59 | Down |
| ENSG00000184207 | <i>PGP</i>        | 0 | 0 | 1 | 0 | 3.12E-03 | -0.50 | Down |
| ENSG00000241644 | <i>INMT</i>       | 0 | 1 | 0 | 0 | 3.16E-03 | 0.72  | Up   |
| ENSG00000048707 | <i>VPS13D</i>     | 0 | 0 | 0 | 0 | 3.17E-03 | -0.60 | Down |
| ENSG00000127616 | <i>SMARCA4</i>    | 1 | 0 | 0 | 0 | 3.17E-03 | -0.38 | Down |
| ENSG00000175550 | <i>DRAP1</i>      | 1 | 0 | 0 | 0 | 3.18E-03 | -0.38 | Down |
| ENSG00000179604 | <i>CDC42EP4</i>   | 0 | 0 | 0 | 0 | 3.18E-03 | -0.66 | Down |
| ENSG00000114166 | <i>KAT2B</i>      | 1 | 0 | 1 | 0 | 3.30E-03 | -0.58 | Down |
| ENSG00000138709 | <i>LARP1B</i>     | 0 | 0 | 1 | 0 | 3.41E-03 | -0.52 | Down |
| ENSG00000072832 | <i>CRMP1</i>      | 0 | 0 | 0 | 0 | 3.42E-03 | 0.75  | Up   |
| ENSG00000223768 | <i>LINC00205</i>  | 0 | 0 | 1 | 0 | 3.49E-03 | 0.65  | Up   |
| ENSG00000151092 | <i>NGLY1</i>      | 0 | 0 | 1 | 0 | 3.52E-03 | -0.43 | Down |
| ENSG00000000457 | <i>SCYL3</i>      | 1 | 0 | 0 | 0 | 3.55E-03 | -0.30 | Down |

|                 |                   |   |   |   |   |          |       |      |
|-----------------|-------------------|---|---|---|---|----------|-------|------|
| ENSG00000099968 | <i>BCL2L13</i>    | 0 | 1 | 0 | 0 | 3.62E-03 | -0.41 | Down |
| ENSG00000204851 | <i>PNMA8B</i>     | 1 | 0 | 0 | 0 | 3.65E-03 | 0.89  | Up   |
| ENSG00000135597 | <i>REPS1</i>      | 1 | 0 | 0 | 0 | 3.69E-03 | 0.49  | Up   |
| ENSG00000081803 | <i>CADPS2</i>     | 0 | 0 | 1 | 0 | 3.74E-03 | -0.73 | Down |
| ENSG00000164949 | <i>GEM</i>        | 0 | 0 | 1 | 0 | 3.78E-03 | 0.90  | Up   |
| ENSG00000138758 | <i>SEPT11</i>     | 0 | 1 | 0 | 0 | 3.83E-03 | 0.45  | Up   |
| ENSG00000096968 | <i>JAK2</i>       | 1 | 0 | 0 | 0 | 3.87E-03 | 0.82  | Up   |
| ENSG00000169855 | <i>ROBO1</i>      | 0 | 1 | 0 | 0 | 3.94E-03 | 0.59  | Up   |
| ENSG00000188290 | <i>HES4</i>       | 1 | 1 | 0 | 0 | 4.00E-03 | 0.57  | Up   |
| ENSG00000159251 | <i>ACTC1</i>      | 0 | 0 | 1 | 0 | 4.01E-03 | -0.45 | Down |
| ENSG00000160075 | <i>SSU72</i>      | 0 | 0 | 1 | 0 | 4.06E-03 | -0.45 | Down |
| ENSG00000173281 | <i>PPP1R3B</i>    | 1 | 0 | 1 | 0 | 4.07E-03 | -0.47 | Down |
| ENSG00000079739 | <i>PGM1</i>       | 0 | 0 | 1 | 0 | 4.09E-03 | -0.33 | Down |
| ENSG00000260186 | <i>LINC02137</i>  | 0 | 0 | 1 | 0 | 4.18E-03 | -1.08 | Down |
| ENSG00000226900 | <i>AL451069.1</i> | 1 | 0 | 1 | 0 | 4.23E-03 | -1.12 | Down |
| ENSG00000115241 | <i>PPM1G</i>      | 1 | 0 | 0 | 0 | 4.27E-03 | -0.45 | Down |
| ENSG00000155659 | <i>VSIG4</i>      | 0 | 1 | 0 | 0 | 4.27E-03 | -1.15 | Down |
| ENSG00000104765 | <i>BNIP3L</i>     | 1 | 0 | 0 | 0 | 4.60E-03 | 0.49  | Up   |
| ENSG00000103404 | <i>USP31</i>      | 0 | 1 | 0 | 0 | 4.62E-03 | -0.53 | Down |
| ENSG00000148356 | <i>LRSAM1</i>     | 0 | 0 | 1 | 0 | 4.77E-03 | -0.58 | Down |
| ENSG00000100105 | <i>PATZ1</i>      | 0 | 0 | 1 | 0 | 4.78E-03 | 0.38  | Up   |
| ENSG00000196504 | <i>PRPF40A</i>    | 1 | 0 | 0 | 0 | 4.85E-03 | -0.34 | Down |
| ENSG00000147155 | <i>EBP</i>        | 0 | 1 | 0 | 0 | 4.90E-03 | -0.70 | Down |
| ENSG00000218283 | <i>MORF4L1P1</i>  | 1 | 0 | 0 | 0 | 4.94E-03 | -0.74 | Down |
| ENSG00000105516 | <i>DBP</i>        | 0 | 1 | 0 | 0 | 4.95E-03 | 0.67  | Up   |
| ENSG00000115317 | <i>HTRA2</i>      | 1 | 0 | 0 | 0 | 4.97E-03 | 0.24  | Up   |
| ENSG00000165916 | <i>PSMC3</i>      | 1 | 0 | 0 | 0 | 5.01E-03 | -0.50 | Down |
| ENSG00000184209 | <i>SNRNP35</i>    | 1 | 0 | 0 | 0 | 5.01E-03 | -0.29 | Down |
| ENSG00000061676 | <i>NCKAP1</i>     | 0 | 1 | 0 | 0 | 5.05E-03 | -0.24 | Down |
| ENSG00000007402 | <i>CACNA2D2</i>   | 1 | 0 | 0 | 0 | 5.10E-03 | 0.59  | Up   |
| ENSG00000198796 | <i>ALPK2</i>      | 1 | 0 | 0 | 0 | 5.10E-03 | -0.44 | Down |
| ENSG00000178573 | <i>MAF</i>        | 0 | 1 | 0 | 0 | 5.24E-03 | 0.54  | Up   |
| ENSG00000164733 | <i>CTSB</i>       | 1 | 1 | 0 | 0 | 5.29E-03 | -0.36 | Down |
| ENSG00000144824 | <i>PHLDB2</i>     | 0 | 1 | 0 | 0 | 5.32E-03 | 0.36  | Up   |
| ENSG00000022840 | <i>RNF10</i>      | 0 | 1 | 0 | 0 | 5.36E-03 | -0.37 | Down |
| ENSG00000006007 | <i>GDE1</i>       | 1 | 0 | 0 | 0 | 5.40E-03 | -0.59 | Down |
| ENSG00000170522 | <i>ELOVL6</i>     | 1 | 0 | 1 | 0 | 5.40E-03 | 0.81  | Up   |
| ENSG00000085760 | <i>MTIF2</i>      | 1 | 0 | 0 | 0 | 5.42E-03 | -0.62 | Down |
| ENSG00000141449 | <i>GREB1L</i>     | 0 | 1 | 0 | 0 | 5.54E-03 | -0.57 | Down |
| ENSG00000126858 | <i>RHOT1</i>      | 0 | 0 | 1 | 0 | 5.62E-03 | -0.39 | Down |
| ENSG00000161981 | <i>SNRNP25</i>    | 1 | 0 | 1 | 0 | 5.76E-03 | -0.35 | Down |
| ENSG00000120907 | <i>ADRA1A</i>     | 1 | 0 | 0 | 0 | 5.83E-03 | -0.67 | Down |
| ENSG00000182541 | <i>LIMK2</i>      | 0 | 0 | 1 | 0 | 5.89E-03 | 0.40  | Up   |
| ENSG00000138495 | <i>COX17</i>      | 1 | 0 | 1 | 0 | 5.91E-03 | -0.43 | Down |
| ENSG00000116132 | <i>PRRX1</i>      | 1 | 0 | 1 | 0 | 5.94E-03 | 0.56  | Up   |
| ENSG00000183873 | <i>SCN5A</i>      | 1 | 0 | 0 | 0 | 5.97E-03 | -0.54 | Down |
| ENSG00000134531 | <i>EMP1</i>       | 1 | 0 | 0 | 0 | 6.10E-03 | 0.79  | Up   |
| ENSG00000243156 | <i>MICAL3</i>     | 1 | 0 | 0 | 0 | 6.12E-03 | -0.50 | Down |
| ENSG00000137941 | <i>TTLL7</i>      | 0 | 0 | 1 | 0 | 6.14E-03 | 0.76  | Up   |
| ENSG00000130382 | <i>MLLT1</i>      | 1 | 0 | 0 | 0 | 6.26E-03 | -0.63 | Down |
| ENSG00000163788 | <i>SNRK</i>       | 1 | 0 | 0 | 0 | 6.26E-03 | 0.37  | Up   |
| ENSG00000196954 | <i>CASP4</i>      | 1 | 0 | 0 | 0 | 6.41E-03 | 0.84  | Up   |
| ENSG00000140986 | <i>RPL3L</i>      | 1 | 0 | 0 | 0 | 6.47E-03 | -0.44 | Down |

|                 |                 |   |   |   |   |          |       |      |
|-----------------|-----------------|---|---|---|---|----------|-------|------|
| ENSG00000162458 | <i>FBLIM1</i>   | 0 | 0 | 0 | 0 | 6.49E-03 | -0.79 | Down |
| ENSG00000156650 | <i>KAT6B</i>    | 1 | 0 | 0 | 0 | 6.72E-03 | -0.38 | Down |
| ENSG00000175463 | <i>TBC1D10C</i> | 1 | 1 | 0 | 0 | 6.73E-03 | 1.03  | Up   |
| ENSG00000171310 | <i>CHST11</i>   | 0 | 0 | 1 | 0 | 6.80E-03 | 0.69  | Up   |
| ENSG00000117114 | <i>ADGRL2</i>   | 1 | 0 | 1 | 0 | 6.80E-03 | -0.74 | Down |
| ENSG00000122033 | <i>MTIF3</i>    | 0 | 0 | 1 | 0 | 6.85E-03 | -0.33 | Down |
| ENSG00000175581 | <i>MRPL48</i>   | 0 | 0 | 1 | 0 | 6.86E-03 | -0.44 | Down |
| ENSG00000178307 | <i>TMEM11</i>   | 0 | 0 | 0 | 0 | 6.86E-03 | -0.49 | Down |
| ENSG00000115641 | <i>FHL2</i>     | 1 | 0 | 0 | 0 | 6.88E-03 | -0.63 | Down |
| ENSG00000050405 | <i>LIMA1</i>    | 0 | 1 | 0 | 0 | 6.92E-03 | 0.63  | Up   |
| ENSG00000213190 | <i>MLLT11</i>   | 0 | 0 | 1 | 0 | 6.94E-03 | 0.49  | Up   |
| ENSG00000110422 | <i>HIPK3</i>    | 0 | 0 | 1 | 0 | 7.20E-03 | -0.38 | Down |
| ENSG00000129351 | <i>ILF3</i>     | 1 | 0 | 0 | 0 | 7.30E-03 | -0.41 | Down |
| ENSG00000166441 | <i>RPL27A</i>   | 1 | 0 | 0 | 0 | 7.31E-03 | -0.30 | Down |
| ENSG00000132589 | <i>FLOT2</i>    | 1 | 0 | 0 | 0 | 7.47E-03 | -0.72 | Down |
| ENSG00000131943 | <i>C19orf12</i> | 0 | 0 | 1 | 0 | 7.48E-03 | -0.33 | Down |
| ENSG00000166278 | <i>C2</i>       | 0 | 0 | 0 | 0 | 7.49E-03 | 1.02  | Up   |
| ENSG00000149212 | <i>SESN3</i>    | 0 | 0 | 1 | 0 | 7.60E-03 | 0.71  | Up   |
| ENSG00000107738 | <i>VSIR</i>     | 0 | 0 | 1 | 0 | 7.74E-03 | -0.41 | Down |
| ENSG00000131462 | <i>TUBG1</i>    | 1 | 0 | 1 | 0 | 7.76E-03 | -0.77 | Down |
| ENSG00000165458 | <i>INPPL1</i>   | 1 | 0 | 0 | 0 | 7.80E-03 | -0.52 | Down |
| ENSG00000186184 | <i>POLR1D</i>   | 1 | 0 | 0 | 0 | 7.83E-03 | -0.57 | Down |
| ENSG00000148303 | <i>RPL7A</i>    | 1 | 0 | 0 | 0 | 7.88E-03 | -0.48 | Down |
| ENSG00000100401 | <i>RANGAP1</i>  | 1 | 0 | 0 | 0 | 7.88E-03 | -0.48 | Down |
| ENSG00000163382 | <i>NAXE</i>     | 0 | 0 | 1 | 0 | 7.95E-03 | -0.40 | Down |
| ENSG00000130640 | <i>TUBGCP2</i>  | 1 | 0 | 0 | 0 | 8.14E-03 | -0.20 | Down |
| ENSG00000121057 | <i>AKAP1</i>    | 0 | 0 | 1 | 0 | 8.15E-03 | -0.52 | Down |
| ENSG00000125753 | <i>VASP</i>     | 1 | 0 | 0 | 0 | 8.16E-03 | -0.59 | Down |
| ENSG00000228526 | <i>MIR34AHG</i> | 0 | 0 | 0 | 0 | 8.17E-03 | 0.97  | Up   |
| ENSG00000140009 | <i>ESR2</i>     | 1 | 0 | 0 | 0 | 8.22E-03 | -0.78 | Down |
| ENSG00000152284 | <i>TCF7L1</i>   | 0 | 1 | 0 | 0 | 8.24E-03 | 0.45  | Up   |
| ENSG00000178878 | <i>APOLD1</i>   | 1 | 0 | 0 | 0 | 8.24E-03 | 0.95  | Up   |
| ENSG00000165775 | <i>FUNDC2</i>   | 0 | 0 | 1 | 0 | 8.26E-03 | -0.35 | Down |
| ENSG00000184007 | <i>PTP4A2</i>   | 0 | 0 | 0 | 0 | 8.29E-03 | -0.40 | Down |
| ENSG00000176222 | <i>ZNF404</i>   | 1 | 0 | 0 | 0 | 8.32E-03 | 0.53  | Up   |
| ENSG00000151883 | <i>PARP8</i>    | 1 | 0 | 0 | 0 | 8.38E-03 | 0.49  | Up   |
| ENSG00000132361 | <i>CLUH</i>     | 1 | 0 | 0 | 0 | 8.42E-03 | -0.26 | Down |
| ENSG00000160818 | <i>GPATCH4</i>  | 0 | 0 | 0 | 0 | 8.45E-03 | -0.48 | Down |
| ENSG00000204397 | <i>CARD16</i>   | 1 | 0 | 0 | 0 | 8.48E-03 | 1.40  | Up   |
| ENSG00000244486 | <i>SCARF2</i>   | 0 | 0 | 1 | 0 | 8.49E-03 | 0.84  | Up   |
| ENSG00000158321 | <i>AUTS2</i>    | 0 | 1 | 0 | 0 | 8.50E-03 | 0.36  | Up   |
| ENSG00000100949 | <i>RABGGTA</i>  | 0 | 0 | 0 | 0 | 8.63E-03 | -0.38 | Down |
| ENSG00000132718 | <i>SYT11</i>    | 1 | 0 | 0 | 0 | 8.67E-03 | 0.68  | Up   |
| ENSG00000198663 | <i>C6orf89</i>  | 1 | 0 | 0 | 0 | 8.79E-03 | -0.38 | Down |
| ENSG00000120549 | <i>KIAA1217</i> | 0 | 0 | 1 | 0 | 8.81E-03 | -0.45 | Down |
| ENSG00000176472 | <i>ZNF575</i>   | 1 | 0 | 0 | 0 | 8.99E-03 | 0.36  | Up   |
| ENSG00000059145 | <i>UNKL</i>     | 1 | 0 | 0 | 0 | 9.00E-03 | 0.32  | Up   |
| ENSG00000173113 | <i>TRMT112</i>  | 1 | 0 | 0 | 0 | 9.04E-03 | -0.22 | Down |
| ENSG00000205339 | <i>IPO7</i>     | 0 | 0 | 1 | 0 | 9.09E-03 | -0.50 | Down |
| ENSG00000100564 | <i>PIGH</i>     | 1 | 0 | 0 | 0 | 9.14E-03 | -0.44 | Down |
| ENSG00000125656 | <i>CLPP</i>     | 0 | 0 | 1 | 0 | 9.19E-03 | -0.61 | Down |
| ENSG00000105186 | <i>ANKRD27</i>  | 1 | 0 | 0 | 0 | 9.24E-03 | -0.38 | Down |
| ENSG00000255248 | <i>MIR100HG</i> | 0 | 0 | 0 | 0 | 9.29E-03 | 0.35  | Up   |

|                 |                   |   |   |   |   |          |       |      |
|-----------------|-------------------|---|---|---|---|----------|-------|------|
| ENSG00000163110 | <i>PDLIM5</i>     | 1 | 0 | 0 | 0 | 9.31E-03 | -0.40 | Down |
| ENSG00000153563 | <i>CD8A</i>       | 0 | 1 | 0 | 0 | 9.38E-03 | 1.43  | Up   |
| ENSG00000003402 | <i>CFLAR</i>      | 0 | 0 | 1 | 0 | 9.48E-03 | -0.32 | Down |
| ENSG00000165028 | <i>NIPSNAP3B</i>  | 0 | 0 | 0 | 0 | 9.48E-03 | -0.52 | Down |
| ENSG00000226950 | <i>DANCR</i>      | 0 | 0 | 1 | 0 | 9.72E-03 | -0.47 | Down |
| ENSG00000166289 | <i>PLEKHF1</i>    | 0 | 0 | 1 | 0 | 9.75E-03 | -0.73 | Down |
| ENSG00000138622 | <i>HCN4</i>       | 1 | 0 | 0 | 0 | 9.89E-03 | -1.20 | Down |
| ENSG00000094975 | <i>SUCO</i>       | 0 | 0 | 1 | 0 | 9.95E-03 | -0.52 | Down |
| ENSG00000257261 | <i>AC008014.1</i> | 0 | 0 | 1 | 0 | 9.96E-03 | -0.71 | Down |
| ENSG00000133678 | <i>TMEM254</i>    | 0 | 0 | 0 | 0 | 9.98E-03 | 0.63  | Up   |
| ENSG00000172201 | <i>ID4</i>        | 0 | 0 | 1 | 0 | 1.00E-02 | 1.11  | Up   |
| ENSG00000172348 | <i>RCAN2</i>      | 0 | 1 | 0 | 0 | 1.01E-02 | -0.31 | Down |
| ENSG00000128272 | <i>ATF4</i>       | 0 | 0 | 0 | 0 | 1.02E-02 | -0.55 | Down |
| ENSG00000164442 | <i>CITED2</i>     | 1 | 0 | 0 | 0 | 1.04E-02 | -0.56 | Down |
| ENSG00000115084 | <i>SLC35F5</i>    | 1 | 0 | 0 | 0 | 1.04E-02 | -0.62 | Down |
| ENSG00000095321 | <i>CRAT</i>       | 1 | 0 | 0 | 0 | 1.04E-02 | -0.63 | Down |
| ENSG00000184983 | <i>NDUFA6</i>     | 1 | 0 | 0 | 0 | 1.05E-02 | -0.40 | Down |
| ENSG00000060339 | <i>CCAR1</i>      | 1 | 0 | 0 | 0 | 1.06E-02 | -0.64 | Down |
| ENSG00000147677 | <i>EIF3H</i>      | 1 | 0 | 0 | 0 | 1.06E-02 | -0.24 | Down |
| ENSG00000261115 | <i>TMEM178B</i>   | 0 | 0 | 1 | 0 | 1.06E-02 | -0.55 | Down |
| ENSG00000006576 | <i>PHTF2</i>      | 0 | 1 | 0 | 0 | 1.07E-02 | -0.61 | Down |
| ENSG00000164023 | <i>SGMS2</i>      | 1 | 0 | 0 | 0 | 1.09E-02 | -0.30 | Down |
| ENSG00000198874 | <i>TYW1</i>       | 1 | 0 | 0 | 0 | 1.10E-02 | 0.21  | Up   |
| ENSG00000180644 | <i>PRF1</i>       | 0 | 1 | 0 | 0 | 1.12E-02 | 1.21  | Up   |
| ENSG00000173638 | <i>SLC19A1</i>    | 1 | 0 | 0 | 0 | 1.12E-02 | 0.39  | Up   |
| ENSG00000118971 | <i>CCND2</i>      | 1 | 0 | 0 | 0 | 1.12E-02 | 0.48  | Up   |
| ENSG00000103342 | <i>GSPT1</i>      | 0 | 0 | 0 | 0 | 1.13E-02 | -0.33 | Down |
| ENSG00000123124 | <i>WWP1</i>       | 0 | 0 | 1 | 0 | 1.14E-02 | -0.34 | Down |
| ENSG00000240694 | <i>PNMA2</i>      | 0 | 1 | 0 | 0 | 1.15E-02 | 0.78  | Up   |
| ENSG00000176720 | <i>BOK</i>        | 0 | 0 | 1 | 0 | 1.16E-02 | 0.72  | Up   |
| ENSG00000198793 | <i>MTOR</i>       | 1 | 1 | 0 | 0 | 1.17E-02 | -0.45 | Down |
| ENSG00000070010 | <i>UFD1</i>       | 1 | 0 | 0 | 0 | 1.18E-02 | -0.36 | Down |
| ENSG00000069702 | <i>TGFBR3</i>     | 0 | 0 | 1 | 0 | 1.19E-02 | -0.69 | Down |
| ENSG00000122359 | <i>ANXA11</i>     | 1 | 0 | 0 | 0 | 1.21E-02 | -0.41 | Down |
| ENSG00000172725 | <i>CORO1B</i>     | 1 | 0 | 0 | 0 | 1.22E-02 | 0.53  | Up   |
| ENSG00000130312 | <i>MRPL34</i>     | 0 | 0 | 1 | 0 | 1.26E-02 | -0.28 | Down |
| ENSG00000163866 | <i>SMIM12</i>     | 0 | 0 | 0 | 0 | 1.27E-02 | -0.46 | Down |
| ENSG00000253304 | <i>TMEM200B</i>   | 0 | 0 | 1 | 0 | 1.27E-02 | 0.50  | Up   |
| ENSG00000099785 | <i>MARCH2</i>     | 1 | 0 | 0 | 0 | 1.27E-02 | -0.78 | Down |
| ENSG00000124702 | <i>KLHDC3</i>     | 0 | 0 | 1 | 0 | 1.28E-02 | -0.31 | Down |
| ENSG00000198355 | <i>PIM3</i>       | 0 | 0 | 0 | 0 | 1.29E-02 | -0.61 | Down |
| ENSG00000170270 | <i>GON7</i>       | 0 | 0 | 1 | 0 | 1.30E-02 | -0.49 | Down |
| ENSG00000177374 | <i>HIC1</i>       | 1 | 1 | 0 | 0 | 1.31E-02 | 0.38  | Up   |
| ENSG00000163399 | <i>ATP1A1</i>     | 0 | 0 | 0 | 0 | 1.32E-02 | -0.47 | Down |
| ENSG00000160862 | <i>AZGP1</i>      | 0 | 0 | 0 | 0 | 1.33E-02 | -0.85 | Down |
| ENSG00000135617 | <i>PRADC1</i>     | 1 | 0 | 0 | 0 | 1.37E-02 | -0.63 | Down |
| ENSG00000114686 | <i>MRPL3</i>      | 0 | 0 | 1 | 0 | 1.38E-02 | -0.61 | Down |
| ENSG00000213722 | <i>DDAH2</i>      | 0 | 0 | 1 | 0 | 1.38E-02 | 0.39  | Up   |
| ENSG00000108797 | <i>CNTNAP1</i>    | 1 | 0 | 0 | 0 | 1.41E-02 | 0.52  | Up   |
| ENSG00000146592 | <i>CREB5</i>      | 0 | 1 | 0 | 0 | 1.42E-02 | 0.76  | Up   |
| ENSG00000117616 | <i>RSRP1</i>      | 0 | 0 | 1 | 0 | 1.42E-02 | 0.43  | Up   |
| ENSG00000180758 | <i>GPR157</i>     | 0 | 0 | 0 | 0 | 1.42E-02 | -0.73 | Down |
| ENSG00000188549 | <i>CCDC9B</i>     | 1 | 0 | 0 | 0 | 1.42E-02 | -0.38 | Down |

|                 |                   |   |   |   |   |          |       |      |
|-----------------|-------------------|---|---|---|---|----------|-------|------|
| ENSG00000185104 | <i>FAF1</i>       | 1 | 0 | 0 | 0 | 1.43E-02 | -0.70 | Down |
| ENSG00000150457 | <i>LATS2</i>      | 1 | 0 | 0 | 0 | 1.43E-02 | 0.57  | Up   |
| ENSG00000087274 | <i>ADD1</i>       | 1 | 0 | 0 | 0 | 1.44E-02 | -0.39 | Down |
| ENSG00000107263 | <i>RAPGEF1</i>    | 1 | 0 | 0 | 0 | 1.46E-02 | -0.45 | Down |
| ENSG00000132613 | <i>MTSS1L</i>     | 1 | 0 | 0 | 0 | 1.46E-02 | -0.43 | Down |
| ENSG00000151729 | <i>SLC25A4</i>    | 1 | 0 | 1 | 0 | 1.48E-02 | -0.37 | Down |
| ENSG00000131697 | <i>NPHP4</i>      | 1 | 0 | 0 | 0 | 1.48E-02 | 0.89  | Up   |
| ENSG00000135074 | <i>ADAM19</i>     | 1 | 0 | 0 | 0 | 1.51E-02 | 0.65  | Up   |
| ENSG00000161791 | <i>FMNL3</i>      | 0 | 0 | 1 | 0 | 1.51E-02 | 0.36  | Up   |
| ENSG00000115840 | <i>SLC25A12</i>   | 0 | 0 | 1 | 0 | 1.53E-02 | -0.44 | Down |
| ENSG00000115461 | <i>IGFBP5</i>     | 0 | 0 | 0 | 0 | 1.53E-02 | 0.48  | Up   |
| ENSG00000113916 | <i>BCL6</i>       | 0 | 0 | 1 | 0 | 1.55E-02 | -0.54 | Down |
| ENSG00000165269 | <i>AQP7</i>       | 1 | 0 | 1 | 0 | 1.59E-02 | -0.38 | Down |
| ENSG00000181896 | <i>ZNF101</i>     | 1 | 0 | 0 | 0 | 1.59E-02 | 0.64  | Up   |
| ENSG00000176903 | <i>PNMA1</i>      | 0 | 0 | 1 | 0 | 1.60E-02 | 0.50  | Up   |
| ENSG00000170871 | <i>KIAA0232</i>   | 1 | 0 | 0 | 0 | 1.67E-02 | -0.52 | Down |
| ENSG00000160216 | <i>AGPAT3</i>     | 1 | 0 | 0 | 0 | 1.70E-02 | -0.53 | Down |
| ENSG00000164736 | <i>SOX17</i>      | 1 | 0 | 0 | 0 | 1.72E-02 | 0.86  | Up   |
| ENSG00000277791 | <i>PSMB3</i>      | 1 | 0 | 0 | 0 | 1.73E-02 | -0.66 | Down |
| ENSG00000152700 | <i>SAR1B</i>      | 1 | 0 | 0 | 0 | 1.73E-02 | -0.38 | Down |
| ENSG00000167549 | <i>CORO6</i>      | 0 | 0 | 1 | 0 | 1.75E-02 | -0.43 | Down |
| ENSG00000237807 | <i>AC022034.1</i> | 0 | 0 | 1 | 0 | 1.75E-02 | -0.81 | Down |
| ENSG00000147100 | <i>SLC16A2</i>    | 0 | 1 | 0 | 0 | 1.76E-02 | 0.55  | Up   |
| ENSG00000037280 | <i>FLT4</i>       | 0 | 0 | 0 | 0 | 1.76E-02 | 0.48  | Up   |
| ENSG00000148229 | <i>POLE3</i>      | 1 | 0 | 0 | 0 | 1.77E-02 | -0.49 | Down |
| ENSG00000248449 | <i>PCDHGB8P</i>   | 0 | 0 | 1 | 0 | 1.78E-02 | -0.77 | Down |
| ENSG00000135272 | <i>MDFIC</i>      | 0 | 0 | 0 | 0 | 1.78E-02 | 0.69  | Up   |
| ENSG00000122965 | <i>RBM19</i>      | 1 | 0 | 0 | 0 | 1.78E-02 | -0.56 | Down |
| ENSG00000155115 | <i>GTF3C6</i>     | 1 | 0 | 0 | 0 | 1.78E-02 | -0.48 | Down |
| ENSG00000182179 | <i>UBA7</i>       | 0 | 0 | 1 | 0 | 1.80E-02 | 0.53  | Up   |
| ENSG00000165886 | <i>UBTD1</i>      | 0 | 0 | 1 | 0 | 1.81E-02 | -0.59 | Down |
| ENSG00000259972 | <i>AC009120.2</i> | 1 | 0 | 0 | 0 | 1.82E-02 | -0.35 | Down |
| ENSG00000131781 | <i>FMO5</i>       | 0 | 0 | 0 | 0 | 1.83E-02 | -0.73 | Down |
| ENSG00000073792 | <i>IGF2BP2</i>    | 0 | 1 | 0 | 0 | 1.84E-02 | -0.73 | Down |
| ENSG00000104904 | <i>OAZ1</i>       | 1 | 0 | 0 | 0 | 1.84E-02 | -0.50 | Down |
| ENSG00000139567 | <i>ACVRL1</i>     | 0 | 0 | 1 | 0 | 1.84E-02 | -0.46 | Down |
| ENSG00000100711 | <i>ZFYVE21</i>    | 0 | 0 | 1 | 0 | 1.85E-02 | 0.34  | Up   |
| ENSG00000131844 | <i>MCCC2</i>      | 1 | 0 | 1 | 0 | 1.86E-02 | -0.47 | Down |
| ENSG00000101400 | <i>SNTA1</i>      | 1 | 0 | 0 | 0 | 1.87E-02 | -0.45 | Down |
| ENSG00000134684 | <i>YARS</i>       | 0 | 1 | 0 | 0 | 1.87E-02 | -0.33 | Down |
| ENSG00000243147 | <i>MRPL33</i>     | 0 | 0 | 1 | 0 | 1.88E-02 | -0.55 | Down |
| ENSG00000168461 | <i>RAB31</i>      | 0 | 0 | 1 | 0 | 1.88E-02 | 0.58  | Up   |
| ENSG00000099889 | <i>ARVCF</i>      | 0 | 1 | 0 | 0 | 1.92E-02 | 0.50  | Up   |
| ENSG00000184887 | <i>BTBD6</i>      | 0 | 0 | 0 | 0 | 1.93E-02 | -0.53 | Down |
| ENSG00000107338 | <i>SHB</i>        | 0 | 0 | 1 | 0 | 1.93E-02 | 0.58  | Up   |
| ENSG00000135749 | <i>PCNX2</i>      | 0 | 0 | 1 | 0 | 1.96E-02 | 0.77  | Up   |
| ENSG00000197653 | <i>DNAH10</i>     | 1 | 0 | 0 | 0 | 1.96E-02 | -0.91 | Down |
| ENSG00000048162 | <i>NOP16</i>      | 1 | 0 | 0 | 0 | 1.98E-02 | -0.34 | Down |
| ENSG00000177600 | <i>RPLP2</i>      | 1 | 0 | 0 | 0 | 1.99E-02 | -0.61 | Down |
| ENSG00000178980 | <i>SELENOW</i>    | 0 | 0 | 1 | 0 | 2.01E-02 | -0.37 | Down |
| ENSG00000156411 | <i>ATP5MPL</i>    | 1 | 0 | 0 | 0 | 2.10E-02 | -0.69 | Down |
| ENSG00000133740 | <i>E2F5</i>       | 1 | 0 | 0 | 0 | 2.11E-02 | -0.28 | Down |
| ENSG00000184110 | <i>EIF3C</i>      | 1 | 0 | 0 | 0 | 2.18E-02 | -1.00 | Down |

|                 |                   |   |   |   |   |          |       |      |
|-----------------|-------------------|---|---|---|---|----------|-------|------|
| ENSG00000165996 | <i>HACD1</i>      | 0 | 0 | 1 | 0 | 2.22E-02 | -0.37 | Down |
| ENSG00000132003 | <i>ZSWIM4</i>     | 1 | 0 | 0 | 0 | 2.22E-02 | 0.70  | Up   |
| ENSG00000111832 | <i>RWDD1</i>      | 0 | 0 | 1 | 0 | 2.26E-02 | -0.46 | Down |
| ENSG00000187678 | <i>SPRY4</i>      | 0 | 0 | 1 | 0 | 2.28E-02 | 0.44  | Up   |
| ENSG00000134463 | <i>ECHDC3</i>     | 0 | 0 | 1 | 0 | 2.29E-02 | -0.33 | Down |
| ENSG00000111052 | <i>LIN7A</i>      | 0 | 1 | 0 | 0 | 2.31E-02 | -0.46 | Down |
| ENSG00000154305 | <i>MIA3</i>       | 1 | 0 | 0 | 0 | 2.31E-02 | -0.30 | Down |
| ENSG00000132326 | <i>PER2</i>       | 0 | 0 | 1 | 0 | 2.31E-02 | 0.75  | Up   |
| ENSG00000116750 | <i>UCHL5</i>      | 1 | 0 | 0 | 0 | 2.35E-02 | -0.35 | Down |
| ENSG00000036257 | <i>CUL3</i>       | 1 | 0 | 0 | 0 | 2.37E-02 | -0.44 | Down |
| ENSG00000006118 | <i>TMEM132A</i>   | 1 | 0 | 0 | 0 | 2.38E-02 | 0.55  | Up   |
| ENSG00000137857 | <i>DUOX1</i>      | 0 | 0 | 1 | 0 | 2.39E-02 | 0.65  | Up   |
| ENSG00000142494 | <i>SLC47A1</i>    | 0 | 0 | 0 | 0 | 2.39E-02 | 0.58  | Up   |
| ENSG00000066697 | <i>MSANTD3</i>    | 1 | 0 | 0 | 0 | 2.50E-02 | -0.88 | Down |
| ENSG00000172932 | <i>ANKRD13D</i>   | 0 | 0 | 1 | 0 | 2.50E-02 | 0.53  | Up   |
| ENSG00000164620 | <i>RELL2</i>      | 1 | 0 | 0 | 0 | 2.58E-02 | 0.60  | Up   |
| ENSG00000186575 | <i>NF2</i>        | 1 | 0 | 0 | 0 | 2.59E-02 | -0.74 | Down |
| ENSG00000031823 | <i>RANBP3</i>     | 1 | 0 | 0 | 0 | 2.60E-02 | -0.48 | Down |
| ENSG00000122483 | <i>CCDC18</i>     | 1 | 0 | 0 | 0 | 2.61E-02 | -0.35 | Down |
| ENSG00000156414 | <i>TDRD9</i>      | 0 | 0 | 1 | 0 | 2.61E-02 | -0.78 | Down |
| ENSG00000066777 | <i>ARFGEF1</i>    | 1 | 0 | 0 | 0 | 2.61E-02 | -0.31 | Down |
| ENSG00000117395 | <i>EBNA1BP2</i>   | 1 | 0 | 0 | 0 | 2.62E-02 | -0.66 | Down |
| ENSG00000104368 | <i>PLAT</i>       | 0 | 0 | 1 | 0 | 2.63E-02 | 0.64  | Up   |
| ENSG00000113811 | <i>SELENOK</i>    | 0 | 0 | 0 | 0 | 2.63E-02 | -0.34 | Down |
| ENSG00000124507 | <i>PACIN1</i>     | 0 | 0 | 1 | 0 | 2.63E-02 | -0.71 | Down |
| ENSG00000186567 | <i>CEACAM19</i>   | 0 | 0 | 0 | 0 | 2.63E-02 | -0.60 | Down |
| ENSG00000131469 | <i>RPL27</i>      | 1 | 0 | 0 | 0 | 2.65E-02 | -0.56 | Down |
| ENSG00000100767 | <i>PAPLN</i>      | 0 | 0 | 0 | 0 | 2.66E-02 | 0.97  | Up   |
| ENSG00000078304 | <i>PPP2R5C</i>    | 1 | 0 | 0 | 0 | 2.67E-02 | -0.41 | Down |
| ENSG00000107242 | <i>PIP5K1B</i>    | 0 | 0 | 1 | 0 | 2.67E-02 | -0.47 | Down |
| ENSG00000167393 | <i>PPP2R3B</i>    | 1 | 0 | 0 | 0 | 2.67E-02 | -0.33 | Down |
| ENSG00000140937 | <i>CDH11</i>      | 0 | 0 | 1 | 0 | 2.70E-02 | 0.56  | Up   |
| ENSG00000155099 | <i>PIP4P2</i>     | 0 | 0 | 1 | 0 | 2.81E-02 | -0.63 | Down |
| ENSG00000196482 | <i>ESRRG</i>      | 0 | 0 | 1 | 0 | 2.82E-02 | -0.47 | Down |
| ENSG00000159176 | <i>CSRP1</i>      | 1 | 0 | 0 | 0 | 2.83E-02 | 0.52  | Up   |
| ENSG00000196396 | <i>PTPN1</i>      | 1 | 0 | 0 | 0 | 2.84E-02 | -0.52 | Down |
| ENSG00000091527 | <i>CDV3</i>       | 1 | 0 | 0 | 0 | 2.85E-02 | -0.40 | Down |
| ENSG00000159674 | <i>SPON2</i>      | 0 | 0 | 0 | 0 | 2.85E-02 | 0.62  | Up   |
| ENSG00000134240 | <i>HMGCS2</i>     | 0 | 0 | 1 | 0 | 2.89E-02 | -2.05 | Down |
| ENSG00000169155 | <i>ZBTB43</i>     | 0 | 0 | 0 | 0 | 2.95E-02 | -0.40 | Down |
| ENSG00000164134 | <i>NAA15</i>      | 1 | 0 | 0 | 0 | 2.98E-02 | -0.41 | Down |
| ENSG00000198356 | <i>ASNA1</i>      | 1 | 0 | 0 | 0 | 3.01E-02 | -0.78 | Down |
| ENSG00000143158 | <i>MPC2</i>       | 1 | 0 | 0 | 0 | 3.02E-02 | -0.24 | Down |
| ENSG00000160219 | <i>GAB3</i>       | 1 | 0 | 0 | 0 | 3.08E-02 | 0.59  | Up   |
| ENSG00000250159 | <i>AC106791.1</i> | 1 | 0 | 0 | 0 | 3.09E-02 | -0.62 | Down |
| ENSG00000103034 | <i>NDRG4</i>      | 0 | 0 | 0 | 0 | 3.09E-02 | -0.34 | Down |
| ENSG00000147601 | <i>TERF1</i>      | 0 | 0 | 1 | 0 | 3.11E-02 | 0.42  | Up   |
| ENSG00000106034 | <i>CPED1</i>      | 0 | 0 | 0 | 0 | 3.11E-02 | 0.37  | Up   |
| ENSG00000130724 | <i>CHMP2A</i>     | 1 | 0 | 0 | 0 | 3.12E-02 | -0.40 | Down |
| ENSG00000136848 | <i>DAB2IP</i>     | 1 | 0 | 0 | 0 | 3.13E-02 | -0.50 | Down |
| ENSG00000145592 | <i>RPL37</i>      | 1 | 0 | 0 | 0 | 3.18E-02 | -0.53 | Down |
| ENSG00000148411 | <i>NACC2</i>      | 0 | 0 | 1 | 0 | 3.26E-02 | -0.47 | Down |
| ENSG00000179262 | <i>RAD23A</i>     | 0 | 0 | 0 | 0 | 3.28E-02 | -0.32 | Down |



|                 |                   |   |   |   |   |          |       |      |
|-----------------|-------------------|---|---|---|---|----------|-------|------|
| ENSG00000164088 | <i>PPM1M</i>      | 0 | 0 | 1 | 0 | 3.31E-02 | 0.44  | Up   |
| ENSG00000169718 | <i>DUS1L</i>      | 0 | 0 | 0 | 0 | 3.31E-02 | -0.37 | Down |
| ENSG00000196428 | <i>TSC22D2</i>    | 0 | 0 | 1 | 0 | 3.32E-02 | 0.44  | Up   |
| ENSG00000204261 | <i>PSMB8-AS1</i>  | 1 | 0 | 0 | 0 | 3.32E-02 | 0.39  | Up   |
| ENSG00000132688 | <i>NES</i>        | 0 | 0 | 1 | 0 | 3.32E-02 | 0.28  | Up   |
| ENSG00000107736 | <i>CDH23</i>      | 0 | 0 | 0 | 0 | 3.35E-02 | 0.71  | Up   |
| ENSG00000115325 | <i>DOK1</i>       | 1 | 0 | 0 | 0 | 3.35E-02 | 0.48  | Up   |
| ENSG00000182636 | <i>NDN</i>        | 0 | 1 | 0 | 0 | 3.36E-02 | 0.44  | Up   |
| ENSG00000125170 | <i>DOK4</i>       | 0 | 0 | 1 | 0 | 3.38E-02 | 0.38  | Up   |
| ENSG00000168275 | <i>COA6</i>       | 0 | 0 | 1 | 0 | 3.40E-02 | -0.41 | Down |
| ENSG00000108883 | <i>EFTUD2</i>     | 0 | 0 | 0 | 0 | 3.43E-02 | -0.26 | Down |
| ENSG00000121579 | <i>NAA50</i>      | 1 | 0 | 0 | 0 | 3.43E-02 | -0.74 | Down |
| ENSG00000093010 | <i>COMT</i>       | 0 | 0 | 1 | 0 | 3.44E-02 | 0.25  | Up   |
| ENSG00000139990 | <i>DCAF5</i>      | 0 | 0 | 0 | 0 | 3.45E-02 | -0.34 | Down |
| ENSG00000011485 | <i>PPP5C</i>      | 1 | 0 | 0 | 0 | 3.47E-02 | -0.32 | Down |
| ENSG00000120688 | <i>WBP4</i>       | 1 | 0 | 0 | 0 | 3.47E-02 | -0.45 | Down |
| ENSG00000019995 | <i>ZRANB1</i>     | 0 | 0 | 0 | 0 | 3.49E-02 | -0.24 | Down |
| ENSG00000160877 | <i>NACC1</i>      | 0 | 0 | 0 | 0 | 3.49E-02 | -0.50 | Down |
| ENSG00000138100 | <i>TRIM54</i>     | 1 | 0 | 0 | 0 | 3.50E-02 | -0.35 | Down |
| ENSG00000175602 | <i>CCDC85B</i>    | 0 | 0 | 0 | 0 | 3.51E-02 | 0.56  | Up   |
| ENSG00000005889 | <i>ZFX</i>        | 0 | 0 | 1 | 0 | 3.52E-02 | -0.34 | Down |
| ENSG00000136279 | <i>DBNL</i>       | 0 | 0 | 1 | 0 | 3.56E-02 | -0.24 | Down |
| ENSG00000157240 | <i>FZD1</i>       | 1 | 0 | 0 | 0 | 3.56E-02 | 0.51  | Up   |
| ENSG00000137171 | <i>KLC4</i>       | 1 | 0 | 0 | 0 | 3.58E-02 | 0.29  | Up   |
| ENSG00000162601 | <i>MYSM1</i>      | 0 | 0 | 1 | 0 | 3.61E-02 | -0.54 | Down |
| ENSG00000230630 | <i>DNM3OS</i>     | 0 | 0 | 1 | 0 | 3.63E-02 | 0.65  | Up   |
| ENSG00000143869 | <i>GDF7</i>       | 0 | 0 | 0 | 0 | 3.65E-02 | 0.76  | Up   |
| ENSG00000141568 | <i>FOXK2</i>      | 1 | 0 | 0 | 0 | 3.68E-02 | -0.28 | Down |
| ENSG00000090061 | <i>CCNK</i>       | 1 | 0 | 0 | 0 | 3.69E-02 | -0.25 | Down |
| ENSG00000151725 | <i>CENPU</i>      | 1 | 0 | 0 | 0 | 3.72E-02 | 0.62  | Up   |
| ENSG00000182253 | <i>SYNM</i>       | 1 | 0 | 0 | 0 | 3.72E-02 | -0.29 | Down |
| ENSG00000263335 | <i>AF001548.2</i> | 1 | 0 | 0 | 0 | 3.79E-02 | 0.52  | Up   |
| ENSG00000103316 | <i>CRYM</i>       | 0 | 0 | 1 | 0 | 3.80E-02 | 0.52  | Up   |
| ENSG00000167705 | <i>RILP</i>       | 0 | 0 | 1 | 0 | 3.80E-02 | -0.42 | Down |
| ENSG00000071127 | <i>WDR1</i>       | 1 | 0 | 0 | 0 | 3.88E-02 | -0.46 | Down |
| ENSG00000182287 | <i>AP1S2</i>      | 0 | 0 | 0 | 0 | 3.90E-02 | -0.34 | Down |
| ENSG00000114670 | <i>NEK11</i>      | 0 | 0 | 0 | 0 | 3.94E-02 | 0.77  | Up   |
| ENSG00000178764 | <i>ZHX2</i>       | 1 | 0 | 0 | 0 | 3.94E-02 | -0.39 | Down |
| ENSG00000197977 | <i>ELOVL2</i>     | 0 | 0 | 0 | 0 | 3.96E-02 | -0.71 | Down |
| ENSG00000179041 | <i>RRS1</i>       | 1 | 0 | 0 | 0 | 4.03E-02 | -0.55 | Down |
| ENSG00000179958 | <i>DCTPP1</i>     | 1 | 0 | 0 | 0 | 4.07E-02 | -0.47 | Down |
| ENSG00000100418 | <i>DESI1</i>      | 0 | 0 | 1 | 0 | 4.09E-02 | -0.29 | Down |
| ENSG00000196843 | <i>ARID5A</i>     | 0 | 0 | 1 | 0 | 4.11E-02 | 0.51  | Up   |
| ENSG00000168763 | <i>CNNM3</i>      | 1 | 0 | 0 | 0 | 4.13E-02 | 0.37  | Up   |
| ENSG00000165487 | <i>MICU2</i>      | 1 | 0 | 0 | 0 | 4.16E-02 | -0.58 | Down |
| ENSG00000170004 | <i>CHD3</i>       | 0 | 0 | 0 | 0 | 4.20E-02 | 0.48  | Up   |
| ENSG00000127191 | <i>TRAF2</i>      | 0 | 0 | 1 | 0 | 4.26E-02 | 0.46  | Up   |
| ENSG00000198873 | <i>GRK5</i>       | 1 | 0 | 0 | 0 | 4.33E-02 | -0.70 | Down |
| ENSG00000019582 | <i>CD74</i>       | 0 | 1 | 0 | 0 | 4.34E-02 | 0.47  | Up   |
| ENSG00000110925 | <i>CSRNP2</i>     | 0 | 0 | 1 | 0 | 4.36E-02 | 0.19  | Up   |
| ENSG00000168615 | <i>ADAM9</i>      | 0 | 0 | 0 | 0 | 4.38E-02 | -0.39 | Down |
| ENSG00000118762 | <i>PKD2</i>       | 0 | 0 | 0 | 0 | 4.42E-02 | 0.32  | Up   |
| ENSG00000141582 | <i>CBX4</i>       | 1 | 0 | 0 | 0 | 4.42E-02 | -0.51 | Down |

|                 |                   |   |   |   |   |          |       |      |
|-----------------|-------------------|---|---|---|---|----------|-------|------|
| ENSG00000171476 | <i>HOPX</i>       | 0 | 0 | 1 | 0 | 4.45E-02 | -1.37 | Down |
| ENSG00000103260 | <i>METRN</i>      | 0 | 0 | 1 | 0 | 4.48E-02 | 0.38  | Up   |
| ENSG00000078061 | <i>ARAF</i>       | 0 | 0 | 0 | 0 | 4.54E-02 | -0.27 | Down |
| ENSG00000090776 | <i>EFNB1</i>      | 0 | 0 | 1 | 0 | 4.54E-02 | -0.33 | Down |
| ENSG00000186716 | <i>BCR</i>        | 1 | 0 | 0 | 0 | 4.57E-02 | -0.71 | Down |
| ENSG00000113140 | <i>SPARC</i>      | 0 | 0 | 0 | 0 | 4.57E-02 | 0.49  | Up   |
| ENSG00000144645 | <i>OSBPL10</i>    | 0 | 0 | 0 | 0 | 4.62E-02 | 0.85  | Up   |
| ENSG00000164683 | <i>HEY1</i>       | 1 | 0 | 0 | 0 | 4.62E-02 | 0.75  | Up   |
| ENSG00000008869 | <i>HEATR5B</i>    | 1 | 0 | 0 | 0 | 4.75E-02 | -0.72 | Down |
| ENSG00000112335 | <i>SNX3</i>       | 1 | 0 | 0 | 0 | 4.81E-02 | -0.42 | Down |
| ENSG00000164897 | <i>TMUB1</i>      | 1 | 0 | 0 | 0 | 4.81E-02 | -0.52 | Down |
| ENSG00000126218 | <i>F10</i>        | 0 | 1 | 0 | 0 | 4.82E-02 | 0.54  | Up   |
| ENSG00000168994 | <i>PXDC1</i>      | 1 | 0 | 0 | 0 | 4.90E-02 | 0.59  | Up   |
| ENSG00000136888 | <i>ATP6V1G1</i>   | 1 | 0 | 0 | 0 | 4.91E-02 | -0.49 | Down |
| ENSG00000277196 | <i>AC007325.2</i> | 0 | 0 | 1 | 0 | 4.94E-02 | -1.03 | Down |
| ENSG00000003096 | <i>KLHL13</i>     | 0 | 0 | 0 | 0 | 4.99E-02 | 0.83  | Up   |

1: '1' or '0' indicates if the gene was identified as differentially expressed gene or not; 2: FDR-adjusted p-value from meta-analysis; 3: Average of log<sub>2</sub>FC from individual studies; 4: 'Up' or 'Down' indicates if the gene was upregulated or downregulated. The genes were sorted based on the adjusted p-values.

Supplementary Table S2. Significant canonical pathways with absolute z-score > 2.0 and their involved genes.

| <b>Ingenuity Canonical Pathways</b>          | <b>-Log(p)<sup>1</sup></b> | <b>z-score<sup>2</sup></b> | <b>Genes</b>                                                                                                                                                                                                                                                  |
|----------------------------------------------|----------------------------|----------------------------|---------------------------------------------------------------------------------------------------------------------------------------------------------------------------------------------------------------------------------------------------------------|
| EIF2 Signaling                               | 11.9                       | -3.27                      | <i>ACTC1, ATF4, CCND1, EIF3C, EIF3H, EIF3K, EIF4G1, EIF5B, MT-TM, PIK3CB, PIK3CD, PPP1CC, PPP1R15A, RAP1A, RPL13A, RPL14, RPL19, RPL26, RPL27, RPL27A, RPL35, RPL37, RPL3L, RPL4, RPL7A, RPL8, RPLP0, RPLP1, RPLP2, RPS12, RPS24, RPS5, RPS7, RPS8, UBA52</i> |
| Oxidative Phosphorylation                    | 2.52                       | -3.32                      | <i>ATP5F1C, ATP5F1E, ATP5MC1, COX17, COX5A, COX7B, MT-ND1, MT-ND2, NDUFA6, NDUFS5, UQCR10</i>                                                                                                                                                                 |
| Senescence Pathway                           | 2.02                       | -2.07                      | <i>ARAF, CAPN1, CCND1, E2F5, EIF4EBP1, EP300, GADD45A, KAT2B, MAPK7, MTOR, PIK3CB, PIK3CD, PPP2R3B, PPP2R5C, PPP3CC, RAP1A, SQSTM1, TGFBR2, TGFBR3</i>                                                                                                        |
| Superpathway of Inositol Phosphate Compounds | 1.4                        | -3.05                      | <i>ATP1A1, INPPL1, ITPK1, PIK3CB, PIK3CD, PIP4P2, PIP5K1B, PLPP7, PPIP5K2, PPP1CC, PPP1R14B, PPP5C, PTPN1</i>                                                                                                                                                 |

1:  $-\log(p) > 1.3$  reflects a significant association between a canonical pathway and its involved genes; 2: Positive and negative z-scores are considered as activated and inhibited, respectively. The pathways were sorted based on the  $-\log(p)$ .

Supplementary Table S3. Differentially expressed upstream regulators and their targeted genes.

| Upstream Regulator | Log <sub>2</sub> FC | Molecule Type                     | Activation z-score <sup>1</sup> | p-value of overlap <sup>2</sup> | Target Molecules in Dataset                                                                                                                                                                                                                                                                                                                                                                                                                       |
|--------------------|---------------------|-----------------------------------|---------------------------------|---------------------------------|---------------------------------------------------------------------------------------------------------------------------------------------------------------------------------------------------------------------------------------------------------------------------------------------------------------------------------------------------------------------------------------------------------------------------------------------------|
| SMARCA4            | -0.38               | transcription regulator           | 0.47                            | 4.61E-10                        | <i>ADGRG1, ANO1, AP1S2, ASCC1, AZGP1, BMP4, BNIP3L, C19orf12, C1orf54, CARD16, CASP1, CCDC85B, CCDC9B, CCN2, CCND1, CD74, CDH11, CKM, CORO6, CP, CTSB, CYP4B1, DES, ECM2, EFN1, EGR1, ELOVL6, FBLIM1, FHL2, GADD45A, HEY1, IGF1, IGFBP5, LOX, LUM, MEIS1, MGP, MMP2, MN1, MT-ND2, MYH11, MYL5, NECTIN1, PLAT, PLIN2, PTP4A2, RAD1, RAMP1, SERPINE2, SLC11A1, SMARCA4, SOCS2, SOD3, SOX17, ST3GAL1, STARD10, TNNT2, TPM1, TUBA3C/TUBA3D, UBE2H</i> |
| ERBB2              | -0.39               | kinase                            | 0.70                            | 5.77E-07                        | <i>ACAA2, ADAM19, ATF4, BCL2L1, CCDC80, CCN2, CCND1, CCND2, CDC37, CDC42SE1, CDH11, CHCHD10, CTSB, CUL3, CYP2J2, CYP4B1, DAG1, DOK1, DPT, E2F5, EBP, EGR1, EIF4EBP1, EMP1, ERBB2, ESR2, F2R, FLOT2, FSCN1, GPX3, GTF3A, HEY1, IGFBP5, JAK1, JUP, KLHDC3, LTBP2, LUM, MAF, MKNK2, NDRG4, PDGFD, PGM1, PIK3CD, PLAT, PLIN2, POLR1D, PRDX2, PSMC3, PTPN1, RAB31, SLC2A1, SOCS2, SOX4, SPARC, STAT3, THBS4, TPM1, TUBA1A, UQCR10</i>                  |
| TBX5               | -0.59               | transcription regulator           | -2.89                           | 7.79E-07                        | <i>ACTC1, ATP2A2, BCL2L1, DES, ECM2, FAP, HSPB7, MYH6, NKX2-5, NPPA, PLA2G2A, SCN5A, TNNT2, TPM1, TTN</i>                                                                                                                                                                                                                                                                                                                                         |
| ESR2               | -0.78               | ligand-dependent nuclear receptor | -0.47                           | 9.16E-06                        | <i>ACTC1, AKAP1, APEX1, ASB2, BAG1, BCL2L1, BMP4, CCN2, CCND1, COL16A1, COMP, EGR1, EP300, ERBB2, ERN1, ESR2, FBLN1, FSCN1, IGF1, JAK1, LOX, MICOS10-NBL1/NBL1, MMP2, MYH6, MYH7, NDRG2, PLAT, PLEC, PLIN2, PLXDC1, PTH1R, S100A9, SFRP4, SLC25A4, SOCS2, SOX4, ST8SIA1, TGFBR2, TGM2, THBS4, TPM1, USP8</i>                                                                                                                                      |
| CCN2               | 1.19                | growth factor                     | 0.88                            | 2.08E-05                        | <i>BCL2L1, CCN2, CCND1, CFLAR, COL8A1, EGR1, IGF1, LOX, MIA3, MMP2, PTH1R, RAMP2, SFRP4, SOX4, SPARC</i>                                                                                                                                                                                                                                                                                                                                          |
| AZGP1              | -0.85               | transporter                       | -1.13                           | 3.05E-05                        | <i>AZGP1, BCL2L1, BMP4, CCND1, DSP, EGR1, MTOR</i>                                                                                                                                                                                                                                                                                                                                                                                                |
| TEAD1              | -0.73               | transcription regulator           | 0.43                            | 7.52E-05                        | <i>CCND1, DES, FIBIN, IGFBP5, LATS2, MYH6, MYH7, NPPA, SULF1, TNNT2, TPM1</i>                                                                                                                                                                                                                                                                                                                                                                     |
| MTA1               | -0.79               | transcription regulator           | -0.60                           | 8.74E-05                        | <i>ACTC1, APEX1, BCL2L1, CCND1, CCND2, EMP1, MMP2, MYH6, STAT3</i>                                                                                                                                                                                                                                                                                                                                                                                |
| HMGA1              | -0.57               | transcription regulator           | -0.22                           | 1.00E-04                        | <i>CCND1, CCND2, EGR1, IER2, IGF1, ITGAL, KCNJ11, NECTIN1, NF2, NKX2-5, PTH1R, RPL7A, SOD3, SOX17, SOX4, SPARC, STAT3</i>                                                                                                                                                                                                                                                                                                                         |
| IGF2BP2            | -0.73               | translation regulator             |                                 | 2.48E-04                        | <i>ELOVL6, LIMS2, TRIM54</i>                                                                                                                                                                                                                                                                                                                                                                                                                      |
| SFRP4              | 2.62                | transmembrane receptor            | 2.00                            | 3.06E-04                        | <i>CCND1, MYH6, MYH7, NKX2-5, TNNT2</i>                                                                                                                                                                                                                                                                                                                                                                                                           |

|                 |       |                            |       |          |                                                                                                                                                                                                                                                                                         |
|-----------------|-------|----------------------------|-------|----------|-----------------------------------------------------------------------------------------------------------------------------------------------------------------------------------------------------------------------------------------------------------------------------------------|
| <i>STAT3</i>    | -0.91 | transcription regulator    | -0.04 | 1.11E-03 | <i>APEX1, BCL2L1, BCL6, BCL9L, BECN1, BNIP3L, BOC, CASP1, CCN2, CCND1, CCND2, CD74, CFLAR, COPS5, CTSB, EGR1, ESR2, FSCN1, GADD45A, HEY1, IGFBP5, JAK2, KAT2B, LOX, MAF, MMP2, MT-ND1, MT-ND2, MYH7, NES, NPPA, PHLDA1, PLA2G2A, PRF1, PTN, S100A9, SERPINE2, SLC1A3, SLC2A1, STAT3</i> |
| <i>CUL3</i>     | -0.44 | enzyme                     | -0.82 | 1.14E-03 | <i>CKMT2, DBP, GSTK1, MFAP4, MYH7, PDLIM5, S100A9, SPON1</i>                                                                                                                                                                                                                            |
| <i>NKX2-5</i>   | -0.85 | transcription regulator    | 0.02  | 1.27E-03 | <i>CBY1, DIO2, HOPX, NKX2-5, NPPA, SCN5A, TBX5</i>                                                                                                                                                                                                                                      |
| <i>TRIM54</i>   | -0.35 | other                      |       | 1.60E-03 | <i>FHL2, FLNC</i>                                                                                                                                                                                                                                                                       |
| <i>TNNT2</i>    | -0.55 | other                      |       | 1.60E-03 | <i>MYH7, NPPA</i>                                                                                                                                                                                                                                                                       |
| <i>SOCS2</i>    | 0.90  | other                      |       | 1.85E-03 | <i>IGF1, MYH7, PIM3, STAT3</i>                                                                                                                                                                                                                                                          |
| <i>PER2</i>     | 0.76  | transcription regulator    |       | 1.85E-03 | <i>ATP1A1, CCND1, DBP, PER2</i>                                                                                                                                                                                                                                                         |
| <i>TTN</i>      | -0.67 | kinase                     |       | 3.07E-03 | <i>ANKRD2, ATP2A2, FHL2</i>                                                                                                                                                                                                                                                             |
| <i>ERN1</i>     | 0.88  | kinase                     | -0.29 | 3.88E-03 | <i>ATF4, ATP2A2, BECN1, GOT1, LAD1, MAP1LC3B, MYH7, NPPA, PLIN2, PVR, SPARC, SYT11, TINAGL1</i>                                                                                                                                                                                         |
| <i>MTOR</i>     | -0.45 | kinase                     | -0.08 | 4.06E-03 | <i>ACACB, ATP2A2, BCL2L1, CASP1, CCND1, CFLAR, CITED2, DAG1, DDAH2, ELOB, FAF1, HADHA, HMGC2, IGF1, JAK2, MAP1LC3B, MTOR, NCAM1, NDUFA6, PGP, PTH1R, SLC2A1, SOX4, SQSTM1, STAT3</i>                                                                                                    |
| <i>DAG1</i>     | -0.65 | transmembrane receptor     | -1.00 | 6.10E-03 | <i>DAG1, SLC2A1, SNTA1, SSPN</i>                                                                                                                                                                                                                                                        |
| <i>JAK2</i>     | 0.82  | kinase                     | 0.64  | 6.56E-03 | <i>BCL2L1, CASP1, CCND1, CCND2, CFLAR, EGR1, F10, JAK2, NDN, SLC11A1, SLC1A3, STAT3, TGM2</i>                                                                                                                                                                                           |
| <i>TFRC</i>     | -1.17 | transporter                | 0.56  | 6.86E-03 | <i>ADGRG1, ATF4, GADD45A, GPX3, PIP5K1B, PPP1R15A, PTN, SLC2A1, UBE2E1</i>                                                                                                                                                                                                              |
| <i>PPP1R15A</i> | 0.72  | other                      |       | 7.39E-03 | <i>ATF4, CCND1, GADD45A, MAP1LC3B</i>                                                                                                                                                                                                                                                   |
| <i>PPP1R13L</i> | -0.54 | transcription regulator    | 1.07  | 7.39E-03 | <i>CCND2, DSP, JUP, SLC2A1</i>                                                                                                                                                                                                                                                          |
| <i>F2R</i>      | 0.92  | G-protein coupled receptor | 2.56  | 8.24E-03 | <i>CASP4, CCN2, CCND1, CDH11, DSP, EGR1, F2R, MMP2, PLAT, TGM2</i>                                                                                                                                                                                                                      |
| <i>IGFBP5</i>   | 0.48  | other                      | 1.98  | 1.05E-02 | <i>BCL2L1, CCND1, IGF1, MYH7</i>                                                                                                                                                                                                                                                        |
| <i>TEAD2</i>    | -0.51 | transcription regulator    | 1.00  | 1.30E-02 | <i>CCND1, FIBIN, IGFBP5, SULF1, TNNT2, TPM1</i>                                                                                                                                                                                                                                         |
| <i>HEY1</i>     | 0.75  | transcription regulator    | -0.22 | 1.43E-02 | <i>MMP2, MYH11, MYH6, NPPA</i>                                                                                                                                                                                                                                                          |
| <i>F10</i>      | 0.54  | peptidase                  |       | 1.67E-02 | <i>CCN2, EGR1, MMP2</i>                                                                                                                                                                                                                                                                 |
| <i>SOX4</i>     | 1.06  | transcription regulator    | 1.01  | 1.77E-02 | <i>APBB1, B3GNT5, CASP1, CD74, CTNNA1, DDAH2, EMP1, IGF1, LHFPL6, NCAM1, PRXL2A, SERPINE2, TEAD1, TUBA1A</i>                                                                                                                                                                            |

|                 |       |                            |       |          |                                                                                                                                                                                   |
|-----------------|-------|----------------------------|-------|----------|-----------------------------------------------------------------------------------------------------------------------------------------------------------------------------------|
| <i>S100A9</i>   | -1.55 | other                      | 1.50  | 1.85E-02 | <i>BECN1, CASP1, CCND1, CP, EPB41L4B, FBLIM1, FURIN, IGF1, KLF15, LOC102724788/PRODH, MMP2, PHLDA1, S100A9</i>                                                                    |
| <i>APBB1</i>    | -0.57 | transcription regulator    |       | 2.03E-02 | <i>CASP4, CCND1, TPM1</i>                                                                                                                                                         |
| <i>MT-TM</i>    | -1.19 | other                      |       | 2.03E-02 | <i>MT-ND1, MT-TM, MT-TQ</i>                                                                                                                                                       |
| <i>BMP4</i>     | 0.63  | growth factor              | 1.14  | 2.05E-02 | <i>ADGRG1, ALDH1A2, BMP4, CCND1, DIO2, HEY1, HOPX, MAFK, NCAM1, NES, SOX17, SPARC, SULF1, TBX5, TGM2</i>                                                                          |
| <i>THBS2</i>    | 0.80  | other                      |       | 2.15E-02 | <i>HEY1, MMP2</i>                                                                                                                                                                 |
| <i>EFNB1</i>    | -0.33 | other                      |       | 2.15E-02 | <i>BCL2L1, CFLAR</i>                                                                                                                                                              |
| <i>BNIP3L</i>   | 0.49  | other                      | 0.82  | 2.21E-02 | <i>BCL2L1, GADD45A, IL16, PIK3CD, STAT3, TFRC</i>                                                                                                                                 |
| <i>RAPGEF1</i>  | -0.45 | other                      |       | 2.42E-02 | <i>DHX38, EFTUD2, RAP1A</i>                                                                                                                                                       |
| <i>CDH11</i>    | 0.56  | other                      | -1.00 | 2.43E-02 | <i>IGF1, JUP, MBD2, S1PR3</i>                                                                                                                                                     |
| <i>NPPA</i>     | 1.86  | other                      | -0.66 | 2.73E-02 | <i>CCND1, EGR1, FLT4, NPPA</i>                                                                                                                                                    |
| <i>NF2</i>      | -0.74 | other                      | -1.98 | 2.73E-02 | <i>CCND1, GLUL, MMP2, NF2</i>                                                                                                                                                     |
| <i>DIO2</i>     | 1.30  | enzyme                     |       | 3.64E-02 | <i>ATP2A2, B3GNT5, EGR1, KCND3, MYH7, NPPA, SLC1A3</i>                                                                                                                            |
| <i>ALDH1A2</i>  | 0.80  | enzyme                     | 0.00  | 3.76E-02 | <i>CCN2, NKX2-5, NPPA, SPARC</i>                                                                                                                                                  |
| <i>STC1</i>     | 1.41  | kinase                     |       | 3.81E-02 | <i>MTOR, STC1</i>                                                                                                                                                                 |
| <i>KAT2B</i>    | -0.58 | transcription regulator    | -0.13 | 3.89E-02 | <i>CCN2, CKM, KAT2B, NPPA, TGFB2</i>                                                                                                                                              |
| <i>RBM25</i>    | -0.38 | other                      |       | 4.00E-02 | <i>BCL2L1</i>                                                                                                                                                                     |
| <i>RPLP0</i>    | -0.92 | other                      |       | 4.00E-02 | <i>CCND1</i>                                                                                                                                                                      |
| <i>MPP3</i>     | -1.23 | kinase                     |       | 4.00E-02 | <i>NECTIN1</i>                                                                                                                                                                    |
| <i>EZR</i>      | -0.32 | other                      | 0.04  | 4.15E-02 | <i>ATF4, BCL2L1, EIF4EBP1, MMP2</i>                                                                                                                                               |
| <i>EIF4EBP1</i> | -0.99 | translation regulator      |       | 4.15E-02 | <i>CCND1, CFLAR, EGR1, SLC2A1</i>                                                                                                                                                 |
| <i>KLF15</i>    | -0.96 | transcription regulator    | -0.70 | 4.21E-02 | <i>BECN1, CCN2, ESRRG, HADHA, NPPA</i>                                                                                                                                            |
| <i>BCL6</i>     | -0.54 | transcription regulator    | 0.21  | 4.63E-02 | <i>BCL2L1, BCL6, CCND1, CCND2, GADD45A, HACD1, MAF, MCM3AP, MGP, PLA2G2A, SOCS2, TRMT13, TUBA3C/TUBA3D, UBA7</i>                                                                  |
| <i>CCND2</i>    | 0.48  | other                      |       | 4.78E-02 | <i>CCND1, CCND2</i>                                                                                                                                                               |
| <i>CAPN1</i>    | -0.41 | peptidase                  |       | 4.78E-02 | <i>MMP2, PTPN1</i>                                                                                                                                                                |
| <i>YBX3</i>     | -0.49 | transcription regulator    |       | 4.78E-02 | <i>CCND1, ERBB2</i>                                                                                                                                                               |
| <i>EP300</i>    | -0.43 | transcription regulator    | -0.59 | 4.85E-02 | <i>ACACB, ARID5A, BCL2L1, BCL6, CCND1, CFLAR, CKM, COMT, EGR1, EP300, EPN1, ERBB2, HMGS2, IGF1, JUP, MAF, MYH11, NPPA, PIP5K1B, PITPNM1, PLEKHF1, RCDSD1, SCN4B, TANC2, TGFB2</i> |
| <i>ADRA1A</i>   | -0.67 | G-protein coupled receptor |       | 4.88E-02 | <i>EGR1, LOX, NPPA, PRRX1, STAT3</i>                                                                                                                                              |

|               |      |               |      |          |                                                                                                                                                                                                     |
|---------------|------|---------------|------|----------|-----------------------------------------------------------------------------------------------------------------------------------------------------------------------------------------------------|
| <i>IGF1</i>   | 0.82 | growth factor | 0.02 | 4.93E-02 | <i>BCL2L1, BMP4, CCN2, CCND1, CCND2, CFLAR, CITED2, EGR1, ESR2, GADD45A, HMGA1, IER2, IGF1, IGFBP5, IL16, MMP2, MYH11, MYH6, NCAM1, NPPA, PHLDA1, PLA2G2A, PPP3CC, PTH1R, SLC12A6, SLC2A1, YBX3</i> |
| <i>CYP2J2</i> | 0.97 | enzyme        |      | 4.96E-02 | <i>BCL2L1, CYP2J2, NPPA</i>                                                                                                                                                                         |

1: Positive and negative z-scores are considered as activated and inhibited, respectively; 2: A p-value of overlap indicates whether there is a statistically significant interaction between an upstream regulator and its regulated genes. A p-value of overlap < 0.05 is considered as statistically significant. The genes were sorted based on the p-value of overlap.
